# Supplementary material for: Sunshine on KOLs: assessment of the nature, extent and evolution of financial ties between the leaders of professional medical associations and the pharmaceutical industry in France from 2014 to 2019: a retrospective study
Source: PubMed Central journal article supplement — BMJ Open. 2022 Feb 2;12(2):e051042. doi: 10.1136/bmjopen-2021-051042 (PMC8811544; doi:10.1136/bmjopen-2021-051042), 2022-02-02
Supplement: bmjopen-2021-051042.draft_revisions.pdf [file bmjopen-2021-051042.draft_revisions.pdf]

# BMJ Open

BMJ Open is committed to open peer review. As part of this commitment we make the peer review history of every article we publish publicly available.

When an article is published we post the peer reviewers' comments and the authors' responses online. We also post the versions of the paper that were used during peer review. These are the versions that the peer review comments apply to.

The versions of the paper that follow are the versions that were submitted during the peer review process. They are not the versions of record or the final published versions. They should not be cited or distributed as the published version of this manuscript.

BMJ Open is an open access journal and the full, final, typeset and author-corrected version of record of the manuscript is available on our site with no access controls, subscription charges or pay-per-view fees (<http://bmjopen.bmj.com>).

If you have any questions on BMJ Open's open peer review process please email [info.bmjopen@bmj.com](mailto:info.bmjopen@bmj.com)

# BMJ Open

## Sunshine on KOL : a retrospective study about financial ties between medical key opinion leaders and pharmaceutical industry in France.

|                               |                                                                                                                                                                                                                                                                                                                                                                                                                 |
|-------------------------------|-----------------------------------------------------------------------------------------------------------------------------------------------------------------------------------------------------------------------------------------------------------------------------------------------------------------------------------------------------------------------------------------------------------------|
| Journal:                      | <i>BMJ Open</i>                                                                                                                                                                                                                                                                                                                                                                                                 |
| Manuscript ID                 | bmjopen-2021-051042                                                                                                                                                                                                                                                                                                                                                                                             |
| Article Type:                 | Original research                                                                                                                                                                                                                                                                                                                                                                                               |
| Date Submitted by the Author: | 09-Mar-2021                                                                                                                                                                                                                                                                                                                                                                                                     |
| Complete List of Authors:     | CLINCKEMAILLIE, Marie; Université Cote d'Azur, Département d'Enseignement et de Recherche en Médecine Générale, RETINES, HEALTHY<br>SCANFF, Alexandre; [(Centre d'Investigation Clinique de Rennes)]<br>Naudet, Florian; [(Centre d'Investigation Clinique de Rennes)]<br>BARBAROUX, Adriaan; Université Cote d'Azur, Département d'Enseignement et de Recherche en Médecine Générale, RETINES, LAPCOS, HEALTHY |
| Keywords:                     | ETHICS (see Medical Ethics), HEALTH ECONOMICS, Quality in health care < HEALTH SERVICES ADMINISTRATION & MANAGEMENT, Public health < INFECTIOUS DISEASES                                                                                                                                                                                                                                                        |
|                               |                                                                                                                                                                                                                                                                                                                                                                                                                 |

SCHOLARONE™  
Manuscripts

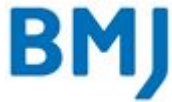

I, the Submitting Author has the right to grant and does grant on behalf of all authors of the Work (as defined in the below author licence), an exclusive licence and/or a non-exclusive licence for contributions from authors who are: i) UK Crown employees; ii) where BMJ has agreed a CC-BY licence shall apply, and/or iii) in accordance with the terms applicable for US Federal Government officers or employees acting as part of their official duties; on a worldwide, perpetual, irrevocable, royalty-free basis to BMJ Publishing Group Ltd ("BMJ") its licensees and where the relevant Journal is co-owned by BMJ to the co-owners of the Journal, to publish the Work in this journal and any other BMJ products and to exploit all rights, as set out in our [licence](#).

The Submitting Author accepts and understands that any supply made under these terms is made by BMJ to the Submitting Author unless you are acting as an employee on behalf of your employer or a postgraduate student of an affiliated institution which is paying any applicable article publishing charge ("APC") for Open Access articles. Where the Submitting Author wishes to make the Work available on an Open Access basis (and intends to pay the relevant APC), the terms of reuse of such Open Access shall be governed by a Creative Commons licence – details of these licences and which [Creative Commons](#) licence will apply to this Work are set out in our licence referred to above.

Other than as permitted in any relevant BMJ Author's Self Archiving Policies, I confirm this Work has not been accepted for publication elsewhere, is not being considered for publication elsewhere and does not duplicate material already published. I confirm all authors consent to publication of this Work and authorise the granting of this licence.

1  
2  
3  
4  
5  
6  
7  
8

## Sunshine on KOL : a retrospective study about financial ties between medical key opinion leaders and pharmaceutical industry in France.

9 Marie CLINCKEMAILLIE, MD (ORCID: 0000-0001-6643-001X)<sup>1</sup>, Alexandre SCANFF, MD (ORCID: 0000-0001-5419-817X)<sup>2</sup>, Florian NAUDET, PhD (ORCID: 0000-0003-3760-3801)<sup>2</sup>, Adriaan BARBAROUX, MD (ORCID: 0000-0002-9243-6922)<sup>3</sup>.

13  
14 <sup>1</sup>Université Cote d'Azur, Département d'Enseignement et de Recherche en Médecine Générale, RETINES, HEALTHY, France

15  
16 <sup>2</sup>Univ Rennes, CHU Rennes, Inserm, CIC 1414 [(Centre d'Investigation Clinique de Rennes)], F- 35000 Rennes, France

17  
18  
19 <sup>3</sup> Université Cote d'Azur, Département d'Enseignement et de Recherche en Médecine Générale, RETINES, LAPCOS, HEALTHY, France

20  
21  
22 Corresponding author : A. Barbaroux

23 [Adriaan.barbaroux@univ-cotedazur.fr](mailto:Adriaan.barbaroux@univ-cotedazur.fr); 2bis Avenue Durante, 06000 Nice

24  
25  
26  
27 Word count of the manuscript text : 2985

## ABSTRACT

### Objective

To investigate the nature, extent and evolution of financial relationships between key opinion leaders (KOL) or non-KOL physicians and pharmaceutical and device companies in France.

### Design

Retrospective and descriptive study

### Setting

All doctors practicing in France, with a focus on 548 KOL defined as board members of all the professional medical associations having published clinical practice guidelines in 2018 or 2019. These 99 associations were identified by the cross-checking of 3 databases.

### Main outcome measures

The number and the amount of gifts (year by year since 2014), remunerations and agreements (year by year since 2017).

### Results

Physicians had 818m€ (\$936m, £741m) of gifts declared from 2014 to 2019. 83% of KOL had such links of interest. The 548 identified KOL represented 0.24% of physicians in France but received 1.5% of the total amount of gifts, i.e. €12.3m (\$14m, £11m or €3 700 per capita per year).

Physicians had 125m€ (\$143m and 114m£) of agreements declared from 2017 to 2019. The 548 KOL received 0.72% of the agreements and 2.5% of the value of the agreements, i.e. 3.1m€ (\$3.6m, £2.8m) or €1 900 per capita per year (\$2200, £1700).

Physicians had 156m€ (\$178m and 141m£) of remunerations declared from 2017 to 2019. The 548 identified KOL received 4.4% of the total value of remunerations to physicians, i.e. 6.8m€ (\$7.8m, £6.2m) or 4 100€ per capita per year (\$4 800, £3 700).

Almost every professional medical associations (99%) had in their board at least one KOL with a financial tie.

### Conclusion

Financial relationships between KOL and the industry in France are extensive, KOL have much more financial ties than non-KOL practitioners. The main limit of this study arises from the quality of information provided on the French Transparency in Healthcare database.

Pre-registration: [osf.io/m8syh](https://osf.io/m8syh)

### Strengths and limitations of this study

This is the first attempt to provide data on the extent of the links of interest between opinion leaders and pharmaceutical industry in France.

Author crossed the nationwide databases of financial ties with three databases of professional medical associations.

All medical doctors practicing in France were included, with a focus on 548 KOL defined as board members of all the professional medical associations having published clinical practice guidelines in 2018 or 2019.

These 99 associations were identified by the cross-checking of 3 different catalogs of French professional associations.

The major links between key opinion leaders and industry ask the question of the independence of the experts, and raises concern that guidelines can be influenced by industry.

Keywords :

Conflict Of Interests – Key Opinion Leaders – public health – quality in health care – medical ethics

## INTRODUCTION

Financial ties between healthcare workers and pharmaceutical industry may affect every aspects of medical activity, from research to clinical practice. Clinical trials and meta-analyses sponsored by the pharmaceutical industry are more likely to conclude that drugs are effective than non-sponsored trials.<sup>1</sup> Industry's transfers of value to physicians have been shown to be associated with more expensive, more frequent and of lower quality prescriptions<sup>2-5</sup>. Recommendations for clinical practice, which define the diagnostic criteria and treatment of the diseases, can also be under influence, since their authors often have ties with the industry.<sup>6-11</sup>

Following the example of the USA with the US Physician Payments Sunshine Act, France created the Transparency in Healthcare public database ([transparence.santé.gouv.fr](http://transparence.santé.gouv.fr)) in 2014.<sup>12-14</sup> Pharmaceutical and medical device industries are required by law to disclose gifts, agreements and remunerations they transfer to healthcare professionals in France.

The term "Key Opinion Leaders" (KOL) refers to physicians who influence their peers' medical practice, including but not limited to prescribing behaviour. It was coined by sociologists who demonstrated that people changed their opinions more because of some individuals in their networks than because of media or advertising: the influence of the physicians' social networks is major to make them adopt a new drug.<sup>15,16</sup> Pharmaceutical companies hire KOLs at different stages of the drug development process, from clinical trials to promotion.<sup>17,18</sup> Typically, KOLs are physicians or researchers who are respected in their field and recognized for their work, such as broad members of professional medical associations.<sup>18-22</sup>

Major ties between leaders of professional medical associations and the pharmaceutical industry have recently been described in North America.<sup>10,11</sup> In France, these links had never been studied yet.

In this study we described the nature and evolution of gifts, agreements and remunerations perceived by key opinion leaders (KOL) and other physicians using the data from the Transparency in Healthcare database. We also grouped gifts, agreements and remunerations perceived by these KOL for each professional medical association they belong to.

## METHODS

As per our protocol (registration number: [osf.io/m8syh](https://osf.io/m8syh)), we conducted a retrospective study of the financial relationships between industry and board members of the national professional medical associations publishing clinical practice guidelines.

### Identifying professional medical associations

Professional medical associations were defined as any group of physicians who published clinical practice guidelines in France. One author (MC) built the list of eligible associations by cross-checking three different databases: the "Catalogue et index des sites médicaux de langue française" (CISMEF)<sup>23</sup>, "Le Parisien" review professional medical associations catalogue<sup>24</sup>) and the "Bibliothèque Médicale AF Lemanissier" (BMLweb)<sup>25</sup>). We included only national associations and excluded association titled as concerning "rare disease". Then, MC searched for those who had published at least one clinical practice recommendation in 2018 or 2019 using Google scholar, academic medical library of the general hospital of Le Mans and CISMEF.

## Identifying Key Opinion Leaders

Using each professional medical association's website, MC identified between October 2018 and May 2020 all physicians who were board members.

KOL were defined as members of the association's board or governing council but not of sub-committees. KOL were identified by their name, medical specialty and city of practice, on the medical association website then if missing on google. Discrepancies and uncertainties were resolved by discussion with a second author (AB).

The Transparency in Healthcare database was downloaded on may 18, 2020 from the website EurosForDocs<sup>26</sup>. EurosForDocs is a tool inspired by the American website DollarsForDocs. EurosForDocs aims to help querying and understanding the Transparency in Healthcare database by cleaning and grouping payments by categories and beneficiaries. It also harmonizes the identification of doctors using their unique identification number in the National Healthcare Professional Registry : the "RPPS" (Répertoire Partagé des Professionnels de Santé). RPPS of the KOL were identified by AS from Health-Directory database and Transparency in Healthcare database. Uncertainties were resolved by manual inspection (MC).

## Identifying and extracting payment details

By using the RPPS unique identification number, data on payments for the identified leaders<sup>27</sup> were extracted, using categories within the database: gifts, agreements and remunerations. We took into consideration the data from the date they were obligatory to declare: gifts from January 1, 2014 to December 31, 2019 and agreements and remunerations from January 1, 2017 to December 31, 2019.

"Gifts" include anything that is granted without consideration, in kind or in cash, directly or indirectly, of an amount greater than or equal to 10€ (\$11,4) including taxes. "Remunerations" represent the payment by companies for work or services, of an amount greater than or equal to 10€. "Conventions" are agreements involving obligations on both sides: participation in a congress, research or clinical trial activity, training action, etc. The characteristics and date from where the payments were mandatory to declare are presented in **table 1**.

< PLEASE INSERT TABLE 1 HERE >

## Outcome measures and descriptive analyses

The primary outcome was the total amount of gifts received by all the medical physicians and by the identified KOL, year by year since 2014.

A secondary outcome was the number and amount of the 2 additional categories of payments available after 2017 (i.e. agreements and remunerations), year by year since 2017.

Distribution of individual results of KOL pooled for each professional medical association is also presented. Quantitative data were described using median (inter-quartile range, IQR) rather than mean to be less biased by the influence of extreme observations. Binary outcomes were described using n (percentage). All analyses were performed using R.<sup>28</sup>

## Changes to protocol

The secondary outcome including agreements and remunerations was not part of the protocol as these declarations were not mandatory before 2017. However, after having noted that remunerations represented more than 3 times the yearly amount of gifts, it was decided to include agreements and remunerations because we might have missed an important part of physicians-industry ties.

Then, as we identified some outliers with implausible amounts, it was likely that the database contained some errors (e.g. some gifts may have been reported in cents by the company

[outliers typically ending in two zeros]). It was therefore decided a posteriori to exclude amounts exceeding 100 000€ (\$118 000) for a single payment. It corresponds to 35 extreme observations (34 in 2019, 1 in 2018, i.e. 0.0005% of the gifts) and 32m€ (4% of the total and 13% of 2019).

## Patient and public involvement

Patients and public were involved throughout the French FORMINDEP association that aims to improve the independence of physicians' medical education. FORMINDEP's members (patients and physicians) kindly accepted to participate to the manuscript reviewing and editing. French CI3P organization (Patient and Public Partnership Innovation Center of the Faculty of Medicine of Nice) also accepted to participate to the manuscript reviewing and editing. Their comments enhanced the manuscript's quality, especially the discussion.

## RESULTS

### Participants

We identified 238 professional medical associations. 101 of them had produced clinical practice guidelines in 2018 and/or 2019 and two of them had no website or no board on their website. We identified 605 KOL, 548 of them were found on the Transparency in Healthcare database. The number of KOL in each professional medical association ranged from 1 to 12, with a median of 6. 12 KOL belonged to more than one professional medical association. The way KOL were identified is described by the figure 1 : Flowchart.

< PLEASE INSERT HERE FIG.1 : FLOWCHART >

### Transparency in Healthcare public database

The database contained 6b€ (\$7.1b) of ties over 8 years. Gifts represented 1.7b€, agreements represented 1.3b€ and remunerations represented 3b€. <sup>26</sup> Gifts, agreements and remuneration are presented below from the year in which they were consistently declared, that is respectively since 2014, 2017 and 2017.

### Gifts (2014-2019)

For all physicians 7 354 492 gifts were declared for a total amount of 818m€ (\$936m) from 2014 to 2019. The median amount for a gift was 46€ (IQR= 25-60, \$54). Most KOL (83%) had at least one gift declared from 2014 to 2019. KOL's gifts represented 0.68% of the number of all physicians' gifts and 1.5% of the total amount of gifts, i.e. 12.3m€ (\$14m). It represents a median of €3 700 of gifts per KOL per year. The median amount for a KOL's gift was 60€ (IQR = 30–214).

Overall, the gifts declared to all physicians decreased in number and value from 1.3m gifts (151m€) to 923 000 gifts (108m€).

The number, value and proportion of gifts declared to KOL decreased from 9 687 gifts (0.70% of the total number of gifts to physicians) / 2.2m€ (1.5% of the total value of gifts to physicians) to 6044 gifts (0.65% of the total number of gifts to physicians) / 1.5m€ (1.4% of the total value of gifts to physicians).

The evolution year by year for each specific category of gift from 2014 to 2019 is presented in **Table 2**.

< PLEASE INSERT HERE TABLE 2 >



1  
2  
3 Almost all (99%) associations had at least one member of its board who had at least one  
4 declared gift since 2014. The median amount of gifts declared for all the corresponding KOL  
5 of a professional medical association was 61 000€ (IQR= 14 000-143 000 ; \$70 000) but varied  
6 widely between associations. 1% of the associations had no gift declared for their KOL, 16%  
7 had less than 1 000€ gifts per year for their KOL. 39% had between 10 000€ and 50 000€ gifts  
8 and 11% had more than 50 000 € gifts declared for their KOL each year.  
9

### 10 11 **Agreements (2017-2019)**

12 Concerning non-KOL physicians, 1.67 millions agreements were declared for a total of  
13 125m€ (\$143m) from 2017 to 2019. There were 1.28 millions agreements (77%) for which the  
14 reported amount was null. A null amount can be explained either by a report in one of the two  
15 other categories (when the agreement is linked with a gift or remuneration), or by a wrong  
16 declaration.  
17

18 KOL's agreements represented 0.72% of all agreements declared to physicians and  
19 2.5% of the value of these agreements, i.e. 3m€ (\$3,6m). It represents a median of €1 900 of  
20 declared agreements per KOL per year. There were 9 496 KOLs' agreements (79%) for which  
21 the reported amount was null.  
22

23 Overall, agreements declared to all physicians were increasing from 42m€ in 2017 to  
24 43m€ in 2019.

25 The evolution year by year of the total amount, and median amount of agreements is  
26 presented in **table 3**.  
27

28 < PLEASE INSERT TABLE 3 HERE >  
29

30  
31 The number, the value and the proportion of agreements declared to KOL decreased  
32 each year, from 4 400 agreements (0.78% of the number of agreements to physicians) / 1.1m€  
33 (2.6% of the value of agreements to physicians) in 2017 to 3 500 agreements (0.64% of the  
34 number of agreements to physicians) / 1m€ (2.3% of the value of agreements to physicians) in  
35 2019. This evolution is depicted in **Figure 2**.  
36

37 < PLEASE INSERT FIGURE 2 HERE >  
38

39  
40 The median amount of agreements declared to all the corresponding KOL of an  
41 association was 15 900€ per year (IQR= 390 to 35 617).  
42

### 43 **Remunerations (2017-2019)**

44 For all physicians, 250 873 remunerations were declared totaling 156m€ (\$178m) from  
45 2017 to 2019. The median amount for a remuneration was 250€ (IQR 55-742) (\$296). KOLs'  
46 perceived 2.3% of physicians' remunerations, i.e. 6.8m€ (\$7.8m) or 4.4% of the total value of  
47 remunerations to physicians. Overall, KOLs received 4 times more remunerations than other  
48 physicians, which represents a median of €4 100 of remunerations per KOL per year.  
49

50 Regarding all physicians, remunerations increased in number and total value but the  
51 median amount decreased sharply. The evolution of the total amount of remunerations is  
52 presented in **table 3**. Physicians' remunerations increased from 77 277 remunerations / 49m€  
53 in 2017 to 96 160 remunerations / 54m€ in 2019.  
54

55 The number, value and proportion of remunerations declared to KOL decreased each  
56 year from 2017 (1 900 remunerations, 2.5% of the number of remunerations to physicians,  
57 accounting for 2.3m€ and 4.8% of the value of remunerations to physicians) to 2019 (1 800  
58 remunerations, 1.9% of the number of remunerations to physicians, accounting for 2.1m€ and  
59 4% of the value of remunerations to physicians in 2019).  
60

1  
2  
3 The median amount of remunerations declared for all the corresponding KOL of an  
4 association was 21 000€ per year (IQR 1012 - 68 977, \$25 000).  
5  
6

## 7 **DISCUSSION**

### 8 **Principle findings**

9  
10 During this period, 818m€ of gifts, 125m€ of agreements and 156m€ of remunerations  
11 were declared to physicians in France. The amount of gifts decreased and the total amount of  
12 declared agreements and remunerations increased. Gifts represented the largest amount  
13 declared.  
14

15 Almost every professional medical association included at least one KOL who received  
16 one or more gifts since 2014 (99%) or 2017 (97%). Over the whole period, the median amount  
17 of gifts per association was €61 000 (\$70 000). From 2017 to 2019, the median cumulative  
18 amount for each professional medical association was 15 900€ of agreements and 21 900€ of  
19 remunerations. The number and amount of gifts varied widely from one association to another,  
20 ranging from €0 to 160 000€ (\$189 000) for all the members of one association on the studied  
21 period.  
22

23 The number, value and proportion of gifts, agreements and remunerations for KOLs  
24 were slightly decreasing over time. Remunerations represented the largest amount declared to  
25 KOLs with a median amount per capita 4 times higher than for other physicians. KOLs  
26 represented 0.24% of the physicians but were associated to 1.5% of the gifts, 2.4% of the  
27 agreements and 4.4% of the remunerations in value. It represents €3 700 of gifts, €1 900 of  
28 agreements and €4 100 of remunerations per capita per year. This amount of agreements is  
29 probably underestimated since 79% of KOLs' agreements amount was declared null in the  
30 database (see above).  
31  
32

### 33 **Strengths and Limitations**

34 This study is exhaustive of all ties declared on the French Transparency in Healthcare  
35 database. All physicians practicing in France were included since ties are mandatory to declare.  
36

37 However, the statements may be underestimated since many agreement's amounts were  
38 not available. Indeed, when a physician signs an agreement conferring an advantage, the amount  
39 can be declared either nil, in agreement, in gift or both in agreement and gift. There is no  
40 government control at this level.  
41

42 The effect of this bias is difficult to predict : on the one hand, firms did not declare the  
43 amounts of thousands of agreements, thus underestimating the amounts received by physicians.  
44 On the other hand, the amount of an agreement could be double counted. The entire Eurofordocs  
45 database (with all beneficiaries, without time limitations) contains 5.5 million agreements, 3.3  
46 million of which have a nil amount. 2.2 million gifts claim to be linked to an agreement, but  
47 have an invalid textual link. There are therefore at least 1.1 million agreements with a nil  
48 amount despite the legal obligation to declare it.  
49

50 Another limitation lies in the fact that the data comes from the declarations of the  
51 pharmaceutical industry itself with typos. Moreover, there may be a delay in data reporting, and  
52 remunerations may have been misclassified as it was possible to declare them as gifts or as  
53 remunerations until October, 2017.  
54

55 Finally, in the absence of an official definition, we choose an objective but restrictive  
56 definition of KOL which lead us to rule out many individuals of great leverage that could also  
57 be called KOL .  
58

### 59 **Comparison with other studies**

1  
2  
3 Our results are in line with those observed worldwide but adds new data regarding the  
4 French context. Very recent U.S. study showed that nearly three-quarters of the executives of  
5 the 10 most influential professional medical associations in the U.S. had ties with the  
6 pharmaceutical industry, with wide variations in the amount of payments reported between the  
7 professional medical associations.<sup>10</sup> Total general payments of \$24.8m (20.8m€, £18.9m) were  
8 linked to the 235 KOL of the 10 most influential professional medical associations in 3 years.  
9 The total median general payment was \$6 000 (IQR \$309 to \$54 000) (5000€, £4 500).

10  
11 In this study, KOLs received 10 times more per capita per year in total amount than the  
12 French KOLs, and more than 83 times more in terms of median amount.

13  
14 The amount of money involved in this American study seems to be much more  
15 important. This difference could be explained by societal differences but also by the fact that  
16 we included professional medical associations regardless of their size, cost or influence. On the  
17 other hand, this difference can be explained by the fact that USA represents a population 5 times  
18 larger and 4 times more physicians, which may constitutes an important return on investments.  
19 Finally, in the US, there are more mandatory payments to report, and there are enforcement  
20 measures and effective penalties.<sup>29</sup>

## 21 22 23 **Implications of this study**

24 Despite multiple calls for more distance,<sup>10,30-33</sup> KOL have still privileged relationships  
25 with pharmaceutical industry. This phenomenon can lead to lower guidelines' quality and to a  
26 general loss of confidence in both KOL and physicians. Indeed, several guidelines were  
27 abrogated since there have been doubts about the independence of the experts involved in their  
28 writing.<sup>34-37</sup> In turn, Chakroun et al. have shown that conflict of interests disclosure reduces  
29 public and physicians' trust in KOL.<sup>38</sup> Experience shows that financial ties can also be  
30 instrumentalized to discredit any expert position, the link being used as an argument to call into  
31 question the scientific opinion.<sup>39-41</sup>

32  
33 Our study's finding of remaining concealment of the agreements amounts, despite the  
34 legal obligation to declare them, shows that transparency is still in progress and that both  
35 researchers and citizens do not yet have access to all data. For us, the main area for improvement  
36 would be to make it mandatory to report the amount of benefits and remunerations conferred  
37 by the agreement in the agreement section. Moreover, the declarations should be checked by  
38 the public authorities, which is the only guarantee of the reliability of the information provided.

39  
40 Future research might focus on the correlation between the amount of gifts and the  
41 medical specialty or the cost of the concerned diseases. Further research is needed to identify  
42 other kinds of KOL such as the department heads of the teaching hospitals, and the medical  
43 university lecturers. Financial ties could be tracked over time, acting as a nudge to help chart  
44 moves towards independence.  
45  
46  
47

## 48 **Acknowledgments**

49 We thank Pierre-Alain Jachiet for his proofreading of the manuscript, his help to fully  
50 understand the database and use properly EuroForDocs.

51  
52 Patients and public were involved throughout the French FORMINDEP association that  
53 aims to improve the independence of physicians' medical education. FORMINDEP's members  
54 (patients and physicians) kindly accepted to participate to the manuscript reviewing and editing.  
55 French CI3P organization (Patient and Public Partnership Innovation Center of the Faculty of  
56 Medicine of Nice) also accepted to participate to the manuscript reviewing and editing. Their  
57 comments enhanced the manuscript's quality, especially the discussion.  
58  
59  
60

## Footnotes

Funding : none

Competing interest : All authors have completed the ICMJE uniform disclosure form and declare: no support from any organisation for the submitted work, no financial relationships with any organisations that might have an interest in the submitted work in the previous three years, no other relationships or activities that could appear to have influenced the submitted work.

Author Contributions : MC and AB initiated and designed the study, searched the literature, interpreted the results and wrote the manuscript. AS performed the analysis, contributed to the study design and interpreted results. FN contributed to the study design and interpreted the results. AB is the guarantor. All authors have critically revised the manuscript and approved the manuscript. The corresponding author attests that all listed authors meet authorship criteria and that no others meeting the criteria have been omitted.

Ethical approval : the French Commission Nationale Informatique et Libertés approved this study.

Data sharing statement : Data from EurosForDocs are available on <https://www.eurosfordocs.fr/data#donn-es>. Analytic code from the study is available on [https://osf.io/4756p/?view\\_only=df16d649d87847e5aa9478960620bf81](https://osf.io/4756p/?view_only=df16d649d87847e5aa9478960620bf81)

The guarantor (AB) affirms that the manuscript is an honest, accurate, and transparent account of the study being reported; that no important aspect of the study was omitted; and that any discrepancies from the study as originally planned have been explained.

Figures legend/Caption :

**Figure 1.** Flowchart, representing how KOL were identified by crossing three databases.

**Figure 2.** Evolution of the 3 kinds of financial ties for KOL and all physicians. The gifts declared to all physicians were decreasing in number and value over time; the number, the value and the proportion of gifts declared to KOL were decreasing. The agreements declared to all physicians were increasing; the number, the value and the proportion of agreements declared to KOL were decreasing. The remunerations declared to all physicians were increasing; the number, the value and the proportion of remunerations declared to KOL were decreasing.

## References

1. Lundh A, Lexchin J, Mintzes B, Schroll JB, Bero L. Industry sponsorship and research outcome. *Cochrane Database Syst Rev.* 2017;2:MR000033. doi:10.1002/14651858.MR000033.pub3
2. Brunt CS. Physician characteristics, industry transfers, and pharmaceutical prescribing: Empirical evidence from medicare and the physician payment sunshine act. *Health Serv Res.* Published online October 1, 2018. doi:10.1111/1475-6773.13064

3. Hadland SE, Rivera-Aguirre A, Marshall BDL, Cerdá M. Association of Pharmaceutical Industry Marketing of Opioid Products With Mortality From Opioid-Related Overdoses. *JAMA Netw Open*. 2019;2(1):e186007. doi:10.1001/jamanetworkopen.2018.6007
4. DeJong C, Aguilar T, Tseng C-W, Lin GA, Boscardin WJ, Dudley RA. Pharmaceutical Industry–Sponsored Meals and Physician Prescribing Patterns for Medicare Beneficiaries. *JAMA Intern Med*. 2016;176(8):1114. doi:10.1001/jamainternmed.2016.2765
5. Goupil B, Balusson F, Naudet F, et al. Association between gifts from pharmaceutical companies to French general practitioners and their drug prescribing patterns in 2016: retrospective study using the French Transparency in Healthcare and National Health Data System databases. *The BMJ*. 2019;367. doi:10.1136/bmj.l6015
6. Schott G, Dünneweber C, Mühlbauer B, Niebling W, Pacht H, Ludwig W-D. Does the Pharmaceutical Industry Influence Guidelines? *Dtsch Arztebl Int*. 2013;110(35-36):575-583. doi:10.3238/arztebl.2013.0575
7. Horn J, Checketts JX, Jawhar O, Vassar M. Evaluation of Industry Relationships Among Authors of Otolaryngology Clinical Practice Guidelines. *JAMA Otolaryngol Neck Surg*. 2018;144(3):194-201. doi:10.1001/jamaoto.2017.2741
8. Combs TR, Scott J, Jorski A, Heavener T, Vassar M. Evaluation of Industry Relationships Among Authors of Clinical Practice Guidelines in Gastroenterology. *JAMA Intern Med*. 2018;178(12):1711-1712. doi:10.1001/jamainternmed.2018.4730
9. Checketts JX, Sims MT, Vassar M. Evaluating Industry Payments Among Dermatology Clinical Practice Guidelines Authors. *JAMA Dermatol*. 2017;153(12):1229-1235. doi:10.1001/jamadermatol.2017.3109
10. Moynihan R, Albarqouni L, Nangla C, Dunn AG, Lexchin J, Bero L. Financial ties between leaders of influential US professional medical associations and industry: cross sectional study. *BMJ*. 2020;369. doi:10.1136/bmj.m1505
11. Elder K, Turner KA, Cosgrove L, et al. Reporting of financial conflicts of interest by Canadian clinical practice guideline producers: a descriptive study. *Can Med Assoc J*. 2020;192(23):E617. doi:10.1503/cmaj.191737
12. LOI N° 2011-2012 Du 29 Décembre 2011 Relative Au Renforcement de La Sécurité Sanitaire Du Médicament et Des Produits de Santé.; 2011.
13. Décret n° 2016-1939 du 28 décembre 2016 relatif à la déclaration publique d'intérêts prévue à l'article L. 1451-1 du code de la santé publique et à la transparence des avantages accordés par les entreprises produisant ou commercialisant des produits à finalité sanitaire et cosmétique destinés à l'homme | Legifrance. Accessed June 14, 2020. <https://www.legifrance.gouv.fr/eli/decret/2016/12/28/AFSX1637582D/jo/texte>
14. Fabbri A, Santos Ancel la, Mezinska S, Mulinari S, Mintzes B. Sunshine Policies and Murky Shadows in Europe: Disclosure of Pharmaceutical Industry Payments to Health Professionals in Nine European Countries. *Int J Health Policy Manag*. 2018;7(6):504-509. doi:10.15171/ijhpm.2018.20
15. Sismondo S. How to make opinion leaders and influence people. *CMAJ Can Med Assoc J*. 2015;187(10):759-760. doi:10.1503/cmaj.150032
16. Coleman J, Katz E. The Diffusion of an Innovation among Physicians! :18.
17. The Pharma Marketing Glossary. Pharma Marketing Network. Accessed July 19, 2020. <https://www.pharma-mkting.com/glossary/>
18. Moynihan R. Key opinion leaders: independent experts or drug representatives in disguise? *BMJ*. 2008;336(7658):1402-1403. doi:10.1136/bmj.39575.675787.651
19. Sismondo S. Key Opinion Leaders and the Corruption of Medical Knowledge: What the Sunshine Act Will and Won't Cast Light on. *J Law Med Ethics*. 2013;41(3):635-643. doi:10.1111/jlme.12073

20. Meffert JJ. Key opinion leaders: where they come from and how that affects the drugs you prescribe. *Dermatol Ther*. 2009;22(3):262-268. doi:10.1111/j.1529-8019.2009.01240.x
21. Revue Prescrire. Leaders d'opinion : coûteux, mais rentables pour les firmes pharmaceutiques. 2005;25(266):777.
22. Revue Prescrire. Les leaders d'opinion, instrument marketing des firmes. *Rev Prescrire*. 2012;32(341):219.
23. Société savante - CISMeF. Accessed June 14, 2020. <http://www.chu-rouen.fr/page/cismef-type-ressource/societe-savante>
24. Liste de sociétés savantes scientifiques en France. Accessed June 14, 2020. <http://dictionnaire.sensagent.leparisien.fr/LISTE%20DE%20SOCIETES%20SAVANTES%20SCIENTIFIQUES%20EN%20FRANCE/fr-fr/>
25. Nouveautés, consensus et lignes directrices - Bmlweb. Accessed June 14, 2020. <http://www.bmlweb.org/nouveaute.html>
26. Euros for Docs - vision par professionnel bénéficiaire. Accessed June 14, 2020. <https://www.eurosfordocs.fr/metabase/dashboard/2>
27. Traitement des données Eurosfordocs. Euros For Docs. Accessed June 14, 2020. <https://www.eurosfordocs.fr/data/>
28. R Development Core Team (2005). R: A language and environment for statistical computing. R Foundation for Statistical Computing, Vienna, Austria. ISBN 3-900051-07-0, URL: <http://www.R-project.org>. Accessed August 12, 2020. <https://wp.unil.ch/asi/documentation/citer-r-dans-un-rapport/>
29. Rapport : La prévention des conflits d'intérêts en matière d'expertise sanitaire – mars 2016. Accessed August 5, 2020. <https://www.ccomptes.fr/sites/default/files/EzPublish/20160323-prevention-conflits-interets-en-matiere-expertise-sanitaire.pdf#page=65>
30. Fava GA. Should the drug industry work with key opinion leaders? *No. BMJ*. 2008;336(7658):1405. doi:10.1136/bmj.39541.731493.59
31. Sculier J-P. Conflits d'intérêt : une notion souvent (volontairement) ignorée des médecins Conflicts of interest : a concept often (voluntary) ignored by physicians. *Rev Med Brux*. 2010;(31):199-205.
32. Wilson M. The Sunshine Act: Commercial conflicts of interest and the limits of transparency. *Open Med*. 2014;8(1):e10-e13.
33. Moynihan R, Bero L, Hill S, et al. Pathways to independence: towards producing and using trustworthy evidence. *BMJ*. 2019;367. doi:10.1136/bmj.l6576
34. Décision n°2011.05.064/MJ du 18 mai 2011 du Collège de la Haute Autorité de Santé portant abrogation de la recommandation « Diagnostic et prise en charge de la maladie d'Alzheimer et des maladies apparentées ». Haute Autorité de Santé. Accessed November 9, 2020. [https://webzine.has-sante.fr/jcms/c\\_1056866/fr/decision-n2011-05-064/mj-du-18-mai-2011-du-college-de-la-haute-autorite-de-sante-portant-abrogation-de-la-recommandation-diagnostic-et-prise-en-charge-de-la-maladie-d-alzheimer-et-des-maladies-apparentees](https://webzine.has-sante.fr/jcms/c_1056866/fr/decision-n2011-05-064/mj-du-18-mai-2011-du-college-de-la-haute-autorite-de-sante-portant-abrogation-de-la-recommandation-diagnostic-et-prise-en-charge-de-la-maladie-d-alzheimer-et-des-maladies-apparentees)
35. Dyslipidémies : face au doute sur l'impartialité de certains de ses experts, la HAS abroge sa recommandation. Haute Autorité de Santé. Accessed August 5, 2020. [https://www.has-sante.fr/jcms/c\\_2885402/fr/dyslipidemies-face-au-doute-sur-l-impartialite-de-certains-de-ses-experts-la-has-abroge-sa-recommandation](https://www.has-sante.fr/jcms/c_2885402/fr/dyslipidemies-face-au-doute-sur-l-impartialite-de-certains-de-ses-experts-la-has-abroge-sa-recommandation)
36. Traitement médicamenteux du diabète de type 2 : recommandation retirée le 2 mai 2011. Haute Autorité de Santé. Accessed August 5, 2020. [https://www.has-sante.fr/jcms/c\\_459270/fr/traitement-medicamenteux-du-diabete-de-type-2-recommandation-retiree-le-2-mai-2011](https://www.has-sante.fr/jcms/c_459270/fr/traitement-medicamenteux-du-diabete-de-type-2-recommandation-retiree-le-2-mai-2011)
37. Barbaroux A, Jedat V. Lifelong continuing education. Critical analysis of scientific and medical information. *Management of links of interest. exercer* 2020;163:233-6.

- 1  
2  
3 38. Chakroun R, Milhabet I. Medical opinion leaders conflict of interests: effects of  
4 disclosures on the trust of the public and general practitioners. *Rev Epidemiol Sante Publique*.  
5 2011;59(4):233-242. doi:10.1016/j.respe.2010.12.011  
6  
7 39. Conflits d'intérêts : Karine Lacombe répond à Didier Raoult. *egora.fr*. Published June  
8 26, 2020. Accessed August 5, 2020. [https://www.egora.fr/actus-pro/sante-publique/59825-](https://www.egora.fr/actus-pro/sante-publique/59825-conflits-d-interets-karine-lacombe-repond-a-didier-raoult)  
9 [conflits-d-interets-karine-lacombe-repond-a-didier-raoult](https://www.egora.fr/actus-pro/sante-publique/59825-conflits-d-interets-karine-lacombe-repond-a-didier-raoult)  
10  
11 40. Girard E. 118.000 euros de MSD, 116.000 euros de Roche : faut-il s'inquiéter des liens  
12 entre labos et conseils scientifiques ? *Marianne*. Published April 3, 2020. Accessed August 5,  
13 2020. [https://www.marianne.net/societe/118000-euros-de-msd-116000-euros-de-roche-faut-il-](https://www.marianne.net/societe/118000-euros-de-msd-116000-euros-de-roche-faut-il-s-inquieter-des-liens-entre-labos-et)  
14 [s-inquieter-des-liens-entre-labos-et](https://www.marianne.net/societe/118000-euros-de-msd-116000-euros-de-roche-faut-il-s-inquieter-des-liens-entre-labos-et)  
15  
16 41. Sallet F, Lebossé V, Toulemonde M. #TransparenceCHU : comment nous avons  
17 enquêté sur les liens entre labos et médecins. *leparisien.fr*. Published January 10, 2020.  
18 Accessed August 6, 2020. [https://www.leparisien.fr/economie/transparencechu-comment-](https://www.leparisien.fr/economie/transparencechu-comment-nous-avons-enquete-sur-les-liens-entre-labos-et-medecins-10-01-2020-8233257.php)  
19 [nous-avons-enquete-sur-les-liens-entre-labos-et-medecins-10-01-2020-8233257.php](https://www.leparisien.fr/economie/transparencechu-comment-nous-avons-enquete-sur-les-liens-entre-labos-et-medecins-10-01-2020-8233257.php)  
20  
21  
22  
23  
24  
25  
26  
27  
28  
29  
30  
31  
32  
33  
34  
35  
36  
37  
38  
39  
40  
41  
42  
43  
44  
45  
46  
47  
48  
49  
50  
51  
52  
53  
54  
55  
56  
57  
58  
59  
60

**Table 1** presents the 3 categories of links of interest and the date from where they had to be declared on the Transparency in Healthcare database (base Transparence Santé). The Transparency in Healthcare database was laid down in the "Strengthening the safety of medicines and health products" law of December, 2011, and launched in July, 2014.

| <i>Type of ties</i>  | <b>Definition</b>                                                                                                                                                                                                                                                                                                                                                                                                                                                                                            | <b>Information mandatory to declare</b>                                                                                                                                                                                                                                                                                                                                                                                                                                                               |
|----------------------|--------------------------------------------------------------------------------------------------------------------------------------------------------------------------------------------------------------------------------------------------------------------------------------------------------------------------------------------------------------------------------------------------------------------------------------------------------------------------------------------------------------|-------------------------------------------------------------------------------------------------------------------------------------------------------------------------------------------------------------------------------------------------------------------------------------------------------------------------------------------------------------------------------------------------------------------------------------------------------------------------------------------------------|
| <i>Gifts</i>         | Anything that is allocated or paid without consideration by a company to a health actor, with a value of more than 10 euros including taxes. Available categories on the website = gifts, contribution to the cost of promotional, scientific or professional events, accommodation, hospitality, catering, transport, transport and hospitality, in-kind donations, donations, donations of money, grants, training, expenditures for services and advice, fees, failed category association, empty, other. | Identity of the parties concerned, amount, nature and date of each benefit. Mandatory since the law of 2013; actual website availability in 2014.                                                                                                                                                                                                                                                                                                                                                     |
| <i>Agreements</i>    | Contracts involving obligations on the part of the physician and the industry. For example, participation in a congress as a speaker (obligation fulfilled by the professional), with payment for transport and accommodation (obligation fulfilled by the company). The conventions concern research activities, clinical trials, participation in a scientific congress, training activities, etc.                                                                                                         | Identity of the parties concerned, the organizer, the name, date and place of the event, date of the agreement, its precise purpose (mandatory since the law of 2013 ; actual website availability 2014) and the amount (mandatory since the law of 2016, actual website availability in 2017). If the agreements give rise to payments in benefits or remuneration, the payments can be indicated in the category agreements or in benefits or remuneration, with a numerical link to the agreement. |
| <i>Remunerations</i> | Payment for work or services with a value of more than 10 euros including taxes.                                                                                                                                                                                                                                                                                                                                                                                                                             | Identity of the parties, final beneficiary, date of payment, amount if it is greater than or equal to 10euros (available since 2015 but mandatory since the law of 2016, actual website availability in the remuneration section in 2017).                                                                                                                                                                                                                                                            |



**Table 2.** Median (IQR) amount of gifts to KOL and non-KOL physicians in euros (€).

| <i>Gifts category</i>                                  | <i>Physicians category</i> | 2014            | 2015           | 2016           | 2017          | 2018           | 2019          |
|--------------------------------------------------------|----------------------------|-----------------|----------------|----------------|---------------|----------------|---------------|
| <i>Accommodation</i>                                   | <i>All physicians</i>      | 210(165-314)    | 215 (165-341)  | 215 (170-314)  | 215 (164-323) | 221 (170-349)  | 218 (173-328) |
|                                                        | <i>KOL</i>                 | 218 (172-305)   | 220 (170-330)  | 218 (179-296)  | 226 (176-313) | 221 (175-323)  | 229 (180-344) |
| <i>Hospitality</i>                                     | <i>All physicians</i>      | 50 (27-118)     | 45 (25-60)     | 46 (24-60)     | 55 (30-60)    | 53 (28-60)     | 52 (28-60)    |
|                                                        | <i>KOL</i>                 | 70 (30-448)     | 58 (28.2-258)  | 60 (30-258)    | 80.5 (40-362) | 60 (29-319)    | 60 (30-329)   |
| <i>Catering</i>                                        | <i>All physicians</i>      | 40 (24-55)      | 40 (24-56)     | 38 (23-55)     | 38 (23-56)    | 38 (23-56)     | 38 (24-57)    |
|                                                        | <i>KOL</i>                 | 40 (23-59)      | 40 (23-59)     | 40 (23-58)     | 40 (23-58)    | 40 (24-59)     | 40 (24-59)    |
| <i>Transport</i>                                       | <i>All physicians</i>      | 208 (91-420)    | 200 (88-398)   | 191 (85-380)   | 189 (79-357)  | 182 (81-344)   | 177 (77-332)  |
|                                                        | <i>KOL</i>                 | 202 (70-471)    | 206 (74.2-461) | 244 (96-477)   | 207 (77-445)  | 198 (79.8-414) | 187 (71-395)  |
| <i>Contributions to the cost of promotional events</i> | <i>All physicians</i>      | 60 (50-400)     | 60 (50-404)    | 60 (44-400)    | 200 (55-455)  | 400 (250-590)  | 440 (260-650) |
|                                                        | <i>KOL</i>                 | 320 (60-591)    | 350 (60-600)   | 390 (87-650)   | 450 (186-729) | 470 (290-740)  | 538 (290-796) |
| <i>Donations-Grants-Training</i>                       | <i>All physicians</i>      | 21 (17-30)      | 23 (17-50)     | 36 (23-94)     | 62 (30-171)   | 55 (29-171)    | 55 (25-144)   |
|                                                        | <i>KOL</i>                 | 83 (60-275)     | 68 (27.5-1578) | 96 (63.5-138)  | 76 (45-192)   | 155 (42-225)   | 80 (42-180)   |
| <i>Service and consulting</i>                          | <i>All physicians</i>      | 26 (22-30)      | 30 (22-45)     | 30 (24-50)     | 30 (25-40)    | 50 (25-80)     | 116 (40-362)  |
|                                                        | <i>KOL</i>                 | 30 (24-120)     | 47 (29-325)    | 65 (30-600)    | 32 (25-83)    | 130 (74-309)   | 158 (69-506)  |
| <i>Other</i>                                           | <i>All physicians</i>      | 100 (30-350)    | 140 (30-496)   | 100 (19-375)   | 22 (16-84)    | 25 (16-104)    | 49 (16-220)   |
|                                                        | <i>KOL</i>                 | 337 (34.8-1000) | 800 (195-1188) | 700 (100-1000) | 310 (23-915)  | 40 (12-153)    | 79.5 (12-500) |
| <i>TOTAL</i>                                           | <i>All physicians</i>      | 45 (25-60)      | 45 (25-60)     | 45 (25-60)     | 46 (25-60)    | 48 (25-60)     | 49 (26-60)    |
|                                                        | <i>KOL</i>                 | 59 (29-198)     | 60 (30-224)    | 60 (30-217)    | 60 (30-213)   | 60 (31-214)    | 60 (31-210)   |

**Table 3.** Total amount, and median (IQR) amount of agreements, total and median (IQR) amount of remunerations to KOL and non-KOL physicians, year by year since they are consistently declared.

| Payment category  | Physicians category   | Amount                                                                                                                         | 2017                    | 2018            | 2019           | Total        |             |
|-------------------|-----------------------|--------------------------------------------------------------------------------------------------------------------------------|-------------------------|-----------------|----------------|--------------|-------------|
| <u>Agreements</u> | <i>All physicians</i> | Number of agreements for which the amount could not be found in the agreement section (percentage of the number of agreements) | 446 204 (79%)           | 443 687 (79%)   | 394 393 (72%)  | 1 284 284    |             |
|                   |                       | Total value of agreements for which an amount could be found in the agreement section in €                                     | 42 905 877              | 39 962 079      | 43 098 150     | 125 966 106  |             |
|                   |                       | Number of agreements with a declared amount in the agreement section                                                           | 118 860                 | 119 844         | 150 987        | 389 691      |             |
|                   | <i>KOL</i>            | Number of agreements for which the amount could not be found in the agreement section (percentage of the number of agreements) | 3 514 (80%)             | 3 319 (80%)     | 2 663 (76%)    | 9496         |             |
|                   |                       | Total value of agreements for which an amount could be found in the agreement section in €                                     | 1 123 947               | 1 040 295       | 1 000 651      | 3 164 893    |             |
|                   |                       | Number of agreements with a declared amount in the agreement section                                                           | 903                     | 837             | 843            | 2583         |             |
|                   | <u>Remunerations</u>  | <i>All physicians</i>                                                                                                          | Total amount in €       | 49 152 264      | 53 142 546     | 54 254 342   | 156 549 152 |
|                   |                       |                                                                                                                                | Median (IQR)            | 300 (65-750)    | 350 (65-800)   | 130 (50-613) | 250         |
|                   |                       |                                                                                                                                | Number of remunerations | 77 277          | 77 436         | 96 160       | 250 573     |
| <i>KOL</i>        |                       | Total amount in €                                                                                                              | 2 355 894               | 2 346 293       | 2 172 827      | 6 875 014    |             |
|                   |                       | Median (IQR)                                                                                                                   | 946 (527-1440)          | 1000 (600-1497) | 998 (538-1375) | 1000         |             |
|                   |                       | Number of remunerations                                                                                                        | 1950                    | 1901            | 1876           | 5718         |             |

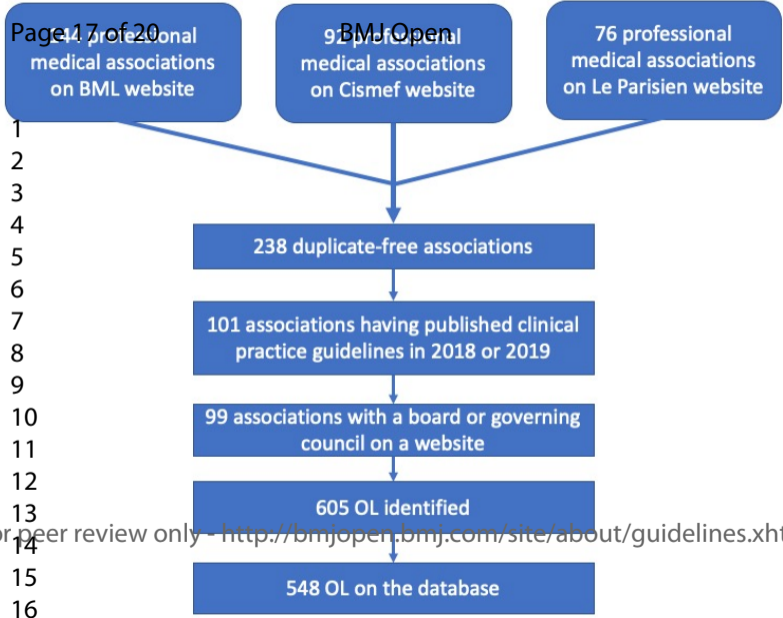

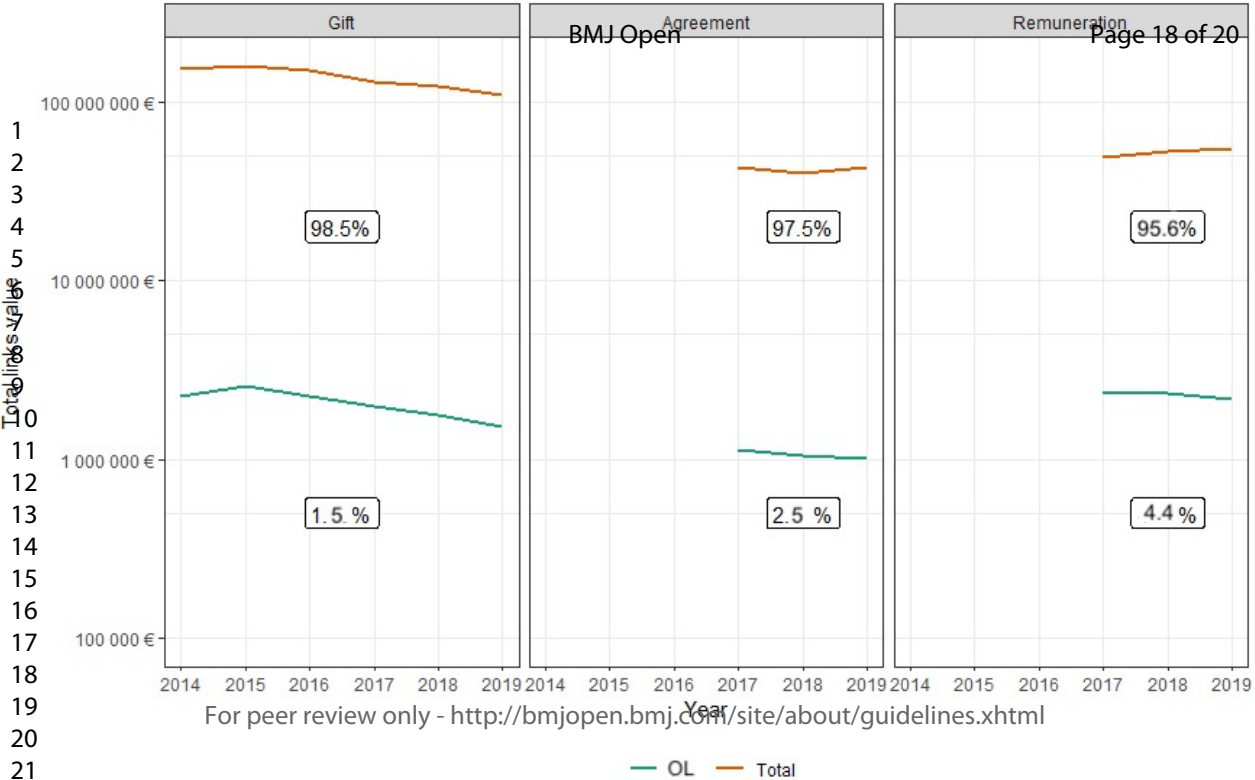

For peer review only - <http://bmjopen.bmj.com/site/about/guidelines.xhtml>

1  
2  
3  
4  
5  
6  
7  
8  
9  
10  
11  
12  
13  
14  
15  
16  
17  
18  
19  
20  
21  
22

— OL — Total

# Reporting checklist for cross sectional study.

Based on the STROBE cross sectional guidelines.

## Instructions to authors

Complete this checklist by entering the page numbers from your manuscript where readers will find each of the items listed below.

Your article may not currently address all the items on the checklist. Please modify your text to include the missing information. If you are certain that an item does not apply, please write "n/a" and provide a short explanation.

Upload your completed checklist as an extra file when you submit to a journal.

In your methods section, say that you used the STROBE cross sectional reporting guidelines, and cite them as:

von Elm E, Altman DG, Egger M, Pocock SJ, Gotsche PC, Vandenbroucke JP. The Strengthening the Reporting of Observational Studies in Epidemiology (STROBE) Statement: guidelines for reporting observational studies.

|                           |                     | Reporting Item                                                                                  | Page Number |
|---------------------------|---------------------|-------------------------------------------------------------------------------------------------|-------------|
| <b>Title and abstract</b> |                     |                                                                                                 |             |
| Title                     | <a href="#">#1a</a> | Indicate the study's design with a commonly used term in the title or the abstract              | 1           |
| Abstract                  | <a href="#">#1b</a> | Provide in the abstract an informative and balanced summary of what was done and what was found | 2           |
| <b>Introduction</b>       |                     |                                                                                                 |             |
| Background / rationale    | <a href="#">#2</a>  | Explain the scientific background and rationale for the investigation being reported            | 3           |
| Objectives                | <a href="#">#3</a>  | State specific objectives, including any prespecified hypotheses                                | 3           |
| <b>Methods</b>            |                     |                                                                                                 |             |
| Study design              | <a href="#">#4</a>  | Present key elements of study design early in the paper                                         | 3           |
| Setting                   | <a href="#">#5</a>  | Describe the setting, locations, and relevant dates, including periods of                       | 3           |

recruitment, exposure, follow-up, and data collection

|    |                      |                      |                                                                                            |
|----|----------------------|----------------------|--------------------------------------------------------------------------------------------|
| 1  |                      |                      |                                                                                            |
| 2  |                      |                      |                                                                                            |
| 3  | Eligibility criteria | <a href="#">#6a</a>  | Give the eligibility criteria, and the sources and methods of selection of participants. 4 |
| 4  |                      |                      |                                                                                            |
| 5  |                      |                      |                                                                                            |
| 6  |                      | <a href="#">#7</a>   | Clearly define all outcomes, exposures, predictors, potential 4                            |
| 7  |                      |                      | confounders, and effect modifiers. Give diagnostic criteria, if applicable                 |
| 8  |                      |                      |                                                                                            |
| 9  |                      |                      |                                                                                            |
| 10 | Data sources /       | <a href="#">#8</a>   | For each variable of interest give sources of data and details of methods 4                |
| 11 | measurement          |                      | of assessment (measurement). Describe comparability of assessment                          |
| 12 |                      |                      | methods if there is more than one group. Give information separately                       |
| 13 |                      |                      | for for exposed and unexposed groups if applicable.                                        |
| 14 |                      |                      |                                                                                            |
| 15 |                      |                      |                                                                                            |
| 16 |                      |                      |                                                                                            |
| 17 | Bias                 | <a href="#">#9</a>   | Describe any efforts to address potential sources of bias 4                                |
| 18 |                      |                      |                                                                                            |
| 19 | Study size           | <a href="#">#10</a>  | Explain how the study size was arrived at 4                                                |
| 20 |                      |                      |                                                                                            |
| 21 | Quantitative         | <a href="#">#11</a>  | Explain how quantitative variables were handled in the analyses. If 4                      |
| 22 | variables            |                      | applicable, describe which groupings were chosen, and why                                  |
| 23 |                      |                      |                                                                                            |
| 24 |                      |                      |                                                                                            |
| 25 | Statistical          | <a href="#">#12a</a> | Describe all statistical methods, including those used to control for 4                    |
| 26 | methods              |                      | confounding                                                                                |
| 27 |                      |                      |                                                                                            |
| 28 |                      |                      |                                                                                            |
| 29 | Statistical          | <a href="#">#12b</a> | Describe any methods used to examine subgroups and interactions 4                          |
| 30 | methods              |                      |                                                                                            |
| 31 |                      |                      |                                                                                            |
| 32 |                      |                      |                                                                                            |
| 33 | Statistical          | <a href="#">#12c</a> | Explain how missing data were addressed 4                                                  |
| 34 | methods              |                      |                                                                                            |
| 35 |                      |                      |                                                                                            |
| 36 |                      |                      |                                                                                            |
| 37 | Statistical          | <a href="#">#12d</a> | If applicable, describe analytical methods taking account of sampling 4                    |
| 38 | methods              |                      | strategy                                                                                   |
| 39 |                      |                      |                                                                                            |
| 40 |                      |                      |                                                                                            |
| 41 | Statistical          | <a href="#">#12e</a> | Describe any sensitivity analyses 4                                                        |
| 42 | methods              |                      |                                                                                            |
| 43 |                      |                      |                                                                                            |
| 44 |                      |                      |                                                                                            |
| 45 | <b>Results</b>       |                      |                                                                                            |
| 46 |                      |                      |                                                                                            |
| 47 | Participants         | <a href="#">#13a</a> | Report numbers of individuals at each stage of study—eg numbers 5                          |
| 48 |                      |                      | potentially eligible, examined for eligibility, confirmed eligible,                        |
| 49 |                      |                      | included in the study, completing follow-up, and analysed. Give                            |
| 50 |                      |                      | information separately for for exposed and unexposed groups if                             |
| 51 |                      |                      | applicable.                                                                                |
| 52 |                      |                      |                                                                                            |
| 53 |                      |                      |                                                                                            |
| 54 |                      |                      |                                                                                            |
| 55 | Participants         | <a href="#">#13b</a> | Give reasons for non-participation at each stage 5                                         |
| 56 |                      |                      |                                                                                            |
| 57 | Participants         | <a href="#">#13c</a> | Consider use of a flow diagram 5                                                           |
| 58 |                      |                      |                                                                                            |
| 59 |                      |                      |                                                                                            |
| 60 |                      |                      |                                                                                            |

|    |                    |                      |                                                                                                                                                                                                                   |   |
|----|--------------------|----------------------|-------------------------------------------------------------------------------------------------------------------------------------------------------------------------------------------------------------------|---|
| 1  | Descriptive data   | <a href="#">#14a</a> | Give characteristics of study participants (eg demographic, clinical, social) and information on exposures and potential confounders. Give information separately for exposed and unexposed groups if applicable. | 5 |
| 2  |                    |                      |                                                                                                                                                                                                                   |   |
| 3  |                    |                      |                                                                                                                                                                                                                   |   |
| 4  |                    |                      |                                                                                                                                                                                                                   |   |
| 5  |                    |                      |                                                                                                                                                                                                                   |   |
| 6  | Descriptive data   | <a href="#">#14b</a> | Indicate number of participants with missing data for each variable of interest                                                                                                                                   | 5 |
| 7  |                    |                      |                                                                                                                                                                                                                   |   |
| 8  |                    |                      |                                                                                                                                                                                                                   |   |
| 9  |                    |                      |                                                                                                                                                                                                                   |   |
| 10 | Outcome data       | <a href="#">#15</a>  | Report numbers of outcome events or summary measures. Give information separately for exposed and unexposed groups if applicable.                                                                                 | 5 |
| 11 |                    |                      |                                                                                                                                                                                                                   |   |
| 12 |                    |                      |                                                                                                                                                                                                                   |   |
| 13 |                    |                      |                                                                                                                                                                                                                   |   |
| 14 | Main results       | <a href="#">#16a</a> | Give unadjusted estimates and, if applicable, confounder-adjusted estimates and their precision (eg, 95% confidence interval). Make clear which confounders were adjusted for and why they were included          | 5 |
| 15 |                    |                      |                                                                                                                                                                                                                   |   |
| 16 |                    |                      |                                                                                                                                                                                                                   |   |
| 17 |                    |                      |                                                                                                                                                                                                                   |   |
| 18 |                    |                      |                                                                                                                                                                                                                   |   |
| 19 | Main results       | <a href="#">#16b</a> | Report category boundaries when continuous variables were categorized                                                                                                                                             | 5 |
| 20 |                    |                      |                                                                                                                                                                                                                   |   |
| 21 | Main results       | <a href="#">#16c</a> | If relevant, consider translating estimates of relative risk into absolute risk for a meaningful time period                                                                                                      | 5 |
| 22 |                    |                      |                                                                                                                                                                                                                   |   |
| 23 |                    |                      |                                                                                                                                                                                                                   |   |
| 24 |                    |                      |                                                                                                                                                                                                                   |   |
| 25 | Other analyses     | <a href="#">#17</a>  | Report other analyses done—e.g., analyses of subgroups and interactions, and sensitivity analyses                                                                                                                 | 5 |
| 26 |                    |                      |                                                                                                                                                                                                                   |   |
| 27 |                    |                      |                                                                                                                                                                                                                   |   |
| 28 |                    |                      |                                                                                                                                                                                                                   |   |
| 29 | <b>Discussion</b>  |                      |                                                                                                                                                                                                                   |   |
| 30 |                    |                      |                                                                                                                                                                                                                   |   |
| 31 | Key results        | <a href="#">#18</a>  | Summarise key results with reference to study objectives                                                                                                                                                          | 7 |
| 32 |                    |                      |                                                                                                                                                                                                                   |   |
| 33 |                    |                      |                                                                                                                                                                                                                   |   |
| 34 | Limitations        | <a href="#">#19</a>  | Discuss limitations of the study, taking into account sources of potential bias or imprecision. Discuss both direction and magnitude of any potential bias.                                                       | 7 |
| 35 |                    |                      |                                                                                                                                                                                                                   |   |
| 36 |                    |                      |                                                                                                                                                                                                                   |   |
| 37 |                    |                      |                                                                                                                                                                                                                   |   |
| 38 |                    |                      |                                                                                                                                                                                                                   |   |
| 39 | Interpretation     | <a href="#">#20</a>  | Give a cautious overall interpretation considering objectives, limitations, multiplicity of analyses, results from similar studies, and other relevant evidence.                                                  | 7 |
| 40 |                    |                      |                                                                                                                                                                                                                   |   |
| 41 |                    |                      |                                                                                                                                                                                                                   |   |
| 42 |                    |                      |                                                                                                                                                                                                                   |   |
| 43 |                    |                      |                                                                                                                                                                                                                   |   |
| 44 | Generalisability   | <a href="#">#21</a>  | Discuss the generalisability (external validity) of the study results                                                                                                                                             | 7 |
| 45 |                    |                      |                                                                                                                                                                                                                   |   |
| 46 |                    |                      |                                                                                                                                                                                                                   |   |
| 47 | <b>Other</b>       |                      |                                                                                                                                                                                                                   |   |
| 48 | <b>Information</b> |                      |                                                                                                                                                                                                                   |   |
| 49 |                    |                      |                                                                                                                                                                                                                   |   |
| 50 |                    |                      |                                                                                                                                                                                                                   |   |
| 51 | Funding            | <a href="#">#22</a>  | Give the source of funding and the role of the funders for the present study and, if applicable, for the original study on which the present article is based                                                     | 9 |
| 52 |                    |                      |                                                                                                                                                                                                                   |   |
| 53 |                    |                      |                                                                                                                                                                                                                   |   |
| 54 |                    |                      |                                                                                                                                                                                                                   |   |
| 55 |                    |                      |                                                                                                                                                                                                                   |   |

The STROBE checklist is distributed under the terms of the Creative Commons Attribution License CC-BY.

This checklist was completed on 07. March 2021 using <https://www.goodreports.org/>, a tool made by the

[EQUATOR Network](#) in collaboration with [Penelope.ai](#)

For peer review only - <http://bmjopen.bmj.com/site/about/guidelines.xhtml>

# BMJ Open

## Sunshine on KOLs: Assessment of the nature, extent and evolution of financial ties between the leaders of professional medical associations and the pharmaceutical industry in France from 2014 to 2019: a retrospective study.

|                                 |                                                                                                                                                                                                                                                                                                                                                                                                                                                                                                                              |
|---------------------------------|------------------------------------------------------------------------------------------------------------------------------------------------------------------------------------------------------------------------------------------------------------------------------------------------------------------------------------------------------------------------------------------------------------------------------------------------------------------------------------------------------------------------------|
| Journal:                        | <i>BMJ Open</i>                                                                                                                                                                                                                                                                                                                                                                                                                                                                                                              |
| Manuscript ID                   | bmjopen-2021-051042.R1                                                                                                                                                                                                                                                                                                                                                                                                                                                                                                       |
| Article Type:                   | Original research                                                                                                                                                                                                                                                                                                                                                                                                                                                                                                            |
| Date Submitted by the Author:   | 25-Aug-2021                                                                                                                                                                                                                                                                                                                                                                                                                                                                                                                  |
| Complete List of Authors:       | CLINCKEMAILLIE, Marie; Universite Cote d'Azur Faculte de Medecine, Département d'Enseignement et de Recherche en Médecine Générale, RETINES, HEALTHY<br>SCANFF, Alexandre; Rennes 1 University<br>Naudet, Florian; Rennes 1 University, Clinical Investigation Center (INSERM 1414) and Adult Psychiatry Department, Rennes University Hospital, Rennes, France<br>BARBAROUX, Adriaan; Universite Cote d'Azur Faculte de Medecine, Département d'Enseignement et de Recherche en Médecine Générale, RETINES, LAPCOS, HEALTHY |
| <b>Primary Subject Heading</b>: | Health economics                                                                                                                                                                                                                                                                                                                                                                                                                                                                                                             |
| Secondary Subject Heading:      | Ethics                                                                                                                                                                                                                                                                                                                                                                                                                                                                                                                       |
| Keywords:                       | ETHICS (see Medical Ethics), HEALTH ECONOMICS, Quality in health care < HEALTH SERVICES ADMINISTRATION & MANAGEMENT, Public health < INFECTIOUS DISEASES                                                                                                                                                                                                                                                                                                                                                                     |
|                                 |                                                                                                                                                                                                                                                                                                                                                                                                                                                                                                                              |

SCHOLARONE™  
Manuscripts





I, the Submitting Author has the right to grant and does grant on behalf of all authors of the Work (as defined in the below author licence), an exclusive licence and/or a non-exclusive licence for contributions from authors who are: i) UK Crown employees; ii) where BMJ has agreed a CC-BY licence shall apply, and/or iii) in accordance with the terms applicable for US Federal Government officers or employees acting as part of their official duties; on a worldwide, perpetual, irrevocable, royalty-free basis to BMJ Publishing Group Ltd ("BMJ") its licensees and where the relevant Journal is co-owned by BMJ to the co-owners of the Journal, to publish the Work in this journal and any other BMJ products and to exploit all rights, as set out in our [licence](#).

The Submitting Author accepts and understands that any supply made under these terms is made by BMJ to the Submitting Author unless you are acting as an employee on behalf of your employer or a postgraduate student of an affiliated institution which is paying any applicable article publishing charge ("APC") for Open Access articles. Where the Submitting Author wishes to make the Work available on an Open Access basis (and intends to pay the relevant APC), the terms of reuse of such Open Access shall be governed by a Creative Commons licence – details of these licences and which [Creative Commons](#) licence will apply to this Work are set out in our licence referred to above.

Other than as permitted in any relevant BMJ Author's Self Archiving Policies, I confirm this Work has not been accepted for publication elsewhere, is not being considered for publication elsewhere and does not duplicate material already published. I confirm all authors consent to publication of this Work and authorise the granting of this licence.

1  
2  
3 **Sunshine on KOLs:**  
4 **Assessment of the nature, extent and evolution of financial ties**  
5 **between the leaders of professional medical associations and the**  
6 **pharmaceutical industry in France from 2014 to 2019: a**  
7 **retrospective study.**  
8  
9  
10

11  
12 Marie CLINCKEMAILLIE, MD (ORCID: 0000-0001-6643-001X)<sup>1</sup>, Alexandre SCANFF,  
13 MD (ORCID: 0000-0001-5419-817X)<sup>2</sup>, Florian NAUDET, PhD (ORCID: 0000-0003-3760-  
14 3801)<sup>2</sup>, Adriaan BARBAROUX, MD (ORCID: 0000-0002-9243-6922)<sup>3</sup>.  
15

16  
17 <sup>1</sup>*Université Cote d'Azur, Département d'Enseignement et de Recherche en Médecine*  
18 *Générale, RETINES, HEALTHY, France*

19 <sup>2</sup>*Univ Rennes, CHU Rennes, Inserm, CIC 1414 [(Centre d'Investigation Clinique de*  
20 *Rennes)], F- 35000 Rennes, France*

21 <sup>3</sup> *Université Cote d'Azur, Département d'Enseignement et de Recherche en Médecine*  
22 *Générale, RETINES, LAPCOS, HEALTHY, France*  
23

24  
25 *Corresponding author: A. Barbaroux*

26 [Adriaan.barbaroux@univ-cotedazur.fr](mailto:Adriaan.barbaroux@univ-cotedazur.fr); 2bis Avenue Durante, 06000 Nice  
27  
28  
29

30 Word count of the manuscript text: 2985  
31  
32  
33  
34  
35  
36  
37  
38  
39  
40  
41  
42  
43  
44  
45  
46  
47  
48  
49  
50  
51  
52  
53  
54  
55  
56  
57  
58  
59  
60

## ABSTRACT

### Objective

To investigate the financial relationships between key opinion leader (KOL) or non-KOL physicians and pharmaceutical and device companies in France.

### Design

Retrospective and descriptive study

### Setting

All doctors practicing in France, with a focus on 548 KOLs (board members of the professional medical associations that published guidelines in 2018-2019, identified on the associations' websites between 2018 and 2020). Ties were collected from the "Transparency in Healthcare" database.

### Main outcome measures

The number and the value of gifts from 2014 to 2019, and of remunerations and contractual agreements from 2017 to 2019.

### Results

KOLs represented 0.24% of the total number of physicians in France. The total value of gifts declared in the French database for all physicians amounted to €818M (\$936M, £741M). At least one gift was declared for 83% of KOLs. KOLs' gifts represented 0.68% of the total number of gifts to physicians and 1.5% of the total value of gifts, with a mean of €3,700 per capita per year.

The total value of contractual agreements declared for all physicians amounted to €125M. Contractual agreements involving the KOLs represented 0.72% of the number of contractual agreements with physicians and 2.5% of the value of the agreements, with a mean of €1,900 per capita per year.

A total of €156M in remunerations was declared for all physicians. KOL remunerations represented 2.3% of the number of physician remunerations and 4.4% of the total value of the remunerations paid to physicians, with a mean of €4,100 per capita per year.

Almost all professional medical associations (99%) had at least one KOL in their board with a financial tie to the industry, but the amount varied widely among the associations.

### Conclusion

Financial relationships between KOLs and the industry in France are extensive. KOLs have much more financial ties than non-KOL practitioners.

### Strengths and limitations of this study

- This is the first time the Transparency in Healthcare database was used to analyze the links between KOLs and the industry.
- The authors cross-checked the nationwide database of financial ties with three databases of professional medical associations.
- All medical doctors practicing in France were included, with a focus on 548 KOLs defined as board members of all the professional medical associations that published clinical practice guidelines in 2018 or 2019.
- The main limitation of this study arises from the quality of information provided by the French Transparency in Healthcare database.
- The definition of KOLs used here is somewhat restrictive and further research is needed to better understand the links between KOLs and the industry.

Keywords :

Conflict Of Interest – Key Opinion Leaders – public health – quality in health care – medical ethics

## INTRODUCTION

Financial ties between healthcare workers and the pharmaceutical industry may affect every aspect of medical activity, from research to clinical practice.<sup>1</sup> Clinical trials and meta-analyses sponsored by the pharmaceutical industry are more likely to conclude that drugs are effective than non-sponsored trials.<sup>2</sup> Industry transfers of value to physicians have been shown to be associated with more expensive, more frequent and lower quality prescriptions.<sup>3-6</sup> Recommendations for clinical practice, which define diagnostic criteria and disease treatment, can also be influenced, since their authors often have ties with the industry.<sup>7-13</sup>

Following the example of the USA with the US Physician Payments Sunshine Act, France created the Transparency in Healthcare public database ([transparence.santé.gouv.fr](http://transparence.santé.gouv.fr)) in 2014.<sup>14-16</sup> Pharmaceutical and medical device industries are required by law to disclose the value of gifts, contractual agreements and remunerations they transfer to healthcare professionals in France. In this database, “Gifts” include anything that is granted without consideration, in kind or in cash, directly or indirectly, with a value greater than or equal to €10 (\$11.4) including taxes. “Remunerations” represent the payment by companies for work or services with a value greater than or equal to €10. “Contractual agreements” involve obligations on both sides: participation in a congress, research or clinical trial activity, training action, etc. For more convenience, this paper will gather both pharmaceutical and medical device industries under the term “pharmaceutical industry”.

The term “Key Opinion Leaders” (KOLs) refers to physicians who influence their peers' medical practice, which includes but is not limited to prescribing behavior. It was coined by sociologists who demonstrated that people were more likely to change their opinions under the influence of individuals in their network than because of the media or advertising: physician social networks hold a major influence in making physicians adopt a new drug.<sup>17,18</sup> Pharmaceutical companies hire KOLs at different stages of the drug development process, from clinical trials to promotion.<sup>19,20</sup> Typically, KOLs are physicians or researchers who are respected in their field and recognized for their work, such as board members of professional medical associations.<sup>20-24</sup>

Major ties between the leaders of professional medical associations and the pharmaceutical industry have recently been described in North America.<sup>11,12</sup> In France, these financial ties had never been studied.

This paper uses the data from the Transparency in Healthcare database to describe the nature, the extent and the evolution of the financial ties of all physicians in France, with a focus on key opinion leaders (KOLs). The ties of professional medical associations were assessed by grouping the gifts, contractual agreements and remunerations received by the KOLs of each professional medical association.

## METHODS

We conducted a retrospective study of the financial relationships between industry and the board members of national professional medical associations that publish clinical practice guidelines. As per our protocol (registration number: [osf.io/m8syh](https://osf.io/m8syh)), we took into consideration the financial ties of each KOL from 2014 to 2019. KOLs were defined as board members of an association from 2018 to 2020.

### Identifying professional medical associations

Professional medical associations were defined as any group of physicians who publish clinical practice guidelines in France. One author (MC) built the list of eligible associations by

1  
2  
3 cross-checking three different databases: the “Bibliothèque Médicale AF Lemanissier”  
4 (BMLweb),<sup>25</sup> the “Catalogue et index des sites médicaux de langue française” (CISMEF),<sup>26</sup> and  
5 the “Le Parisien” catalogue of professional medical associations.<sup>27</sup> We included only national  
6 associations and excluded association titled as concerning a “rare disease”. The BML website  
7 is an academic medical library that lists month by month all the consensus statements,  
8 guidelines and recommendations published in French. MC conducted a search through it from  
9 January 2018 to December 2019 and selected all the national professional medical associations  
10 regardless of the nature of the publications they were listed for. The next step was to examine  
11 the Cismef website, which has a “learned society” section that lists French speaking  
12 professional medical associations. MC selected all the professional medical associations in  
13 France from that list. Finally, MC used the “Le Parisien” database that lists French learned  
14 societies, and selected all the professional medical associations in the “medical science” section.  
15 Duplicates were then eliminated and MC examined the associations one by one to determine  
16 whether they had published guidelines in 2018 or 2019. To do so, BMLweb was used first and  
17 then the search engine for clinical practice guidelines of the Cismef website if there was no  
18 match on BMLweb, and finally Google Scholar and the association website.

## 22 Identifying Key Opinion Leaders

23 Using each professional medical association’s website, MC identified between October  
24 2018 and May 2020 all the physicians who were board members.

25 KOLs were defined as members of the association’s board or governing council but not of sub-  
26 committees. KOLs were identified by name, medical specialty and city of practice via the  
27 medical association website and if missing on Google. Discrepancies and uncertainties were  
28 resolved by discussion with a second author (AB).

29 The Transparency in Healthcare database was downloaded on May 18, 2020 from the  
30 EurosForDocs<sup>28</sup> website. EurosForDocs is a tool inspired by the American website  
31 DollarsForDocs. EurosForDocs aims to help browsers find and understand information in the  
32 Transparency in Healthcare database by cleaning and grouping payments by categories and  
33 beneficiaries. It also harmonizes the identification of doctors using their unique identification  
34 number in the National Healthcare Professional Registry: the “RPPS” (*Répertoire Partagé des*  
35 *Professionnels de Santé*). The RPPS of KOLs were identified by AS in the Health-Directory  
36 database and the Transparency in Healthcare database. Uncertainties were resolved by manual  
37 inspection (MC).

## 42 Identifying and extracting payment details

43 By using the RPPS unique identification number, data regarding payments to the  
44 identified leaders<sup>29</sup> were extracted using the database categories: gifts, contractual agreements  
45 and remunerations. We took the data into consideration starting from the date on which their  
46 declaration became mandatory: gifts from January 1, 2014 to December 31, 2019 and  
47 contractual agreements and remunerations from January 1, 2017 to December 31, 2019.

48 The characteristics and date on which declaration of the payments became mandatory  
49 are presented in **table 1**.

50  
51  
52  
53 < PLEASE INSERT TABLE 1 HERE >

## 55 Outcome measures and descriptive analyses

56 The primary outcome was the total number and value of gifts received by all physicians  
57 and by the identified KOLs year by year since 2014.

1  
2  
3 A secondary outcome was the number and value of payments in the 2 additional  
4 categories available after 2017 (i.e. contractual agreements and remunerations) year by year  
5 since 2017.

6 The distribution of payments to individual KOLs grouped by professional medical  
7 association is also presented. Quantitative data were described using the median (inter-quartile  
8 range, IQR) rather than the mean to be less biased by extreme observations. Binary outcomes  
9 were described using n (percentage). All analyses were performed using R.<sup>30</sup>

## 12 **Changes to protocol**

13 The secondary outcome concerning contractual agreements and remunerations was not  
14 part of the protocol as these declarations were not mandatory before 2017. However, after  
15 having observed that the value of remunerations represented more than 3 times the yearly value  
16 of gifts, it was decided to include contractual agreements and remunerations because without  
17 them, an important part of physician-industry ties would have been missed.

18 We identified some outliers with implausible amounts which seemed to indicate that  
19 some of the information in the database contained errors (e.g. some gifts may have been  
20 reported in cents by the company [outliers typically ending in two zeros]). It was therefore  
21 decided a posteriori to exclude amounts exceeding €100,000 (\$118,000) for a single payment.  
22 This corresponds to 35 extreme observations (34 in 2019, 1 in 2018, i.e. 0.0005% of the gifts)  
23 for an amount of €32M (4% of the total and 13% of 2019).

## 27 **Patient and public involvement**

28 Patients and public were involved through the French FORMINDEP association which  
29 aims to improve the independence of physicians' medical education. FORMINDEP members  
30 (patients and physicians) kindly accepted to participate by reviewing and editing the  
31 manuscript. The French CI3P organization (Patient and Public Partnership Innovation Center  
32 of the Faculty of Medicine of Nice) also accepted to participate in the manuscript's revision  
33 and editing. Their comments improved the manuscript's quality, especially the discussion.

## 37 **RESULTS**

### 40 **Participants**

41 We identified 238 professional medical associations. 101 of them had produced clinical  
42 practice guidelines in 2018 and/or 2019 and two of them had no website or did not describe  
43 their board on their website. We identified 605 KOLs. 548 of them were found on the  
44 Transparency in Healthcare database. The number of KOLs in each professional medical  
45 association ranged from 1 to 12, with a median of 6. 12 KOLs belonged to more than one  
46 professional medical association. The way KOLs were identified is described in the figure 1:  
47 Flowchart.

48  
49 < PLEASE INSERT HERE FIG.1: FLOWCHART >

### 52 **Transparency in Healthcare public database**

53 The database reported financial ties totaling €6B (\$7.1B) over 8 years. Gifts accounted  
54 for €1.7B, contractual agreements for €1.3B and remunerations for €3B.<sup>28</sup> Gifts, contractual  
55 agreements and remunerations are presented below starting from the year in which they were  
56 consistently declared, that is since 2014, 2017 and 2017 respectively.

### 59 **Gifts (2014-2019)**

1  
2  
3 When considering all physicians, 7,354,492 gifts were declared for a total value of  
4 €818M (\$936M) from 2014 to 2019. The median value of a gift was €46 (IQR= 25-60, \$54).  
5 For most KOLs (83%), at least one gift was declared from 2014 to 2019. Gifts to KOLs  
6 represented 0.68% of the total number of physician gifts and 1.5% of the total value of gifts,  
7 i.e. €12.3M (\$14M). This corresponds to a mean of €3,700 in gifts per KOL per year. The  
8 median value of a KOL gift was €60 (IQR = 30–214, \$71).

9  
10 Overall, the gifts declared for all physicians decreased in number and value from 1.3M  
11 gifts (€151M) to 923,000 gifts (€108M).

12 The number, value and proportion of gifts declared for KOLs decreased from 9,687 gifts  
13 (0.70% of the total number of gifts to physicians) / €2.2M (1.5% of the total value of gifts to  
14 physicians) to 6,044 gifts (0.65% of the total number of gifts to physicians) / €1.5M (1.4% of  
15 the total value of gifts to physicians).

16  
17 The evolution year by year for each specific category of gift from 2014 to 2019 is  
18 presented in **Table 2**.

19  
20 < PLEASE INSERT HERE TABLE 2 >  
21  
22

23 Almost all (99%) associations had at least one board member for whom at least one gift  
24 had been declared since 2014. The median value of gifts declared for all the corresponding  
25 KOLs of a professional medical association was €61,000 (IQR= 14,000-143,000; \$70,000) but  
26 varied widely between associations. For 1% of the associations, no gift had been declared for  
27 their KOLs. For 16%, gifts to their KOLs represented less than €1,000 per year. For 39%, the  
28 value of gifts ranged between €10,000 and €50,000 and for 11%, more than €50,000 had been  
29 declared in gifts to their KOLs each year.

### 30 31 32 **Contractual agreements (2017-2019)**

33 For all physicians, 1.67 million contractual agreements were declared from 2017 to 2019  
34 for a total of €125M (\$143M). For 1.28 million of these agreements (77%), the reported amount  
35 was null. A null amount can be explained either by a joint report in one of the two other  
36 categories (when the agreement is linked with a gift or remuneration) or by a wrong declaration.

37 Contractual agreements with KOLs represented 0.72% of all agreements declared for  
38 physicians and 2.5% of the value of these agreements, i.e. €3M (\$3,6M). This corresponds to a  
39 mean of €1,900 in declared agreements per KOL per year. For 9,496 KOL agreements (79%),  
40 the reported amount was null.

41  
42 Overall, contractual agreements declared for all physicians increased from €42M in  
43 2017 to €43M in 2019.

44 The evolution year by year of the total value and median value of agreements is  
45 presented in **table 3**.

46  
47 < PLEASE INSERT TABLE 3 HERE >  
48  
49

50 The number, the value and the proportion of contractual agreements declared for KOLs  
51 decreased each year, from 4,400 agreements (0.78% of the number of agreements with  
52 physicians) / €1.1M (2.6% of the value of agreements with physicians) in 2017 to 3,500  
53 agreements (0.64% of the number of agreements with physicians) / €1M (2.3% of the value of  
54 agreements with physicians) in 2019. This evolution is depicted in **Figure 2**.

55  
56 < PLEASE INSERT FIGURE 2 HERE >  
57  
58  
59  
60

1  
2  
3 The median value of contractual agreements declared for all the corresponding KOLs  
4 of an association was €15,900 per year and also varied widely between associations (IQR= 390  
5 – 35,617).  
6  
7

### 8 **Remunerations (2017-2019)**

9 For all physicians, 250,873 remunerations were declared totaling €156M (\$178M) from  
10 2017 to 2019. The median amount of a remuneration was €250 (IQR 55-742) (\$296). KOLs  
11 received 2.3% of physician remunerations, i.e. €6.8M (\$7.8M) or 4.4% of the total value of  
12 remunerations to physicians. Overall, KOLs received 4 times more remunerations than other  
13 physicians, which represents a mean of €4,100 in remunerations per KOL per year.  
14

15 Regarding all physicians, remunerations increased in number and total value but the  
16 median amount decreased sharply. The evolution of the total amount of remunerations is  
17 presented in **table 3**. Physician remunerations increased from 77,277 remunerations / €49M in  
18 2017 to 96,160 remunerations / €54M in 2019.  
19

20 The number, value and proportion of remunerations declared for KOLs decreased each  
21 year from 2017 (1,900 remunerations, 2.5% of the number of remunerations to physicians,  
22 accounting for €2.3M and 4.8% of the value of remunerations to physicians) to 2019 (1,800  
23 remunerations, 1.9% of the number of remunerations to physicians, accounting for €2.1M and  
24 4% of the value of remunerations to physicians in 2019).  
25

26 The median amount of remunerations declared for all the corresponding KOLs of an  
27 association was €21,000 per year and also varied widely between associations (IQR 1012 - 68  
28 977, \$25,000).  
29

## 30 **DISCUSSION**

### 31 **Principle findings**

32 From 2014 to 2019, €818M in gifts were declared for physicians in France. From 2017  
33 to 2019, €125M in contractual agreements and €156M in remunerations were declared for  
34 physicians in France. The amount of gifts decreased while the total amount of declared  
35 contractual agreements and remunerations increased. Gifts represented the largest amount  
36 declared. 83% of the KOLs received at least one gift from the pharmaceutical industry from  
37 2014 to 2019 for a total amount of €12.3M.  
38

39 Almost every professional medical association included at least one KOL who had  
40 received one or more gifts since 2014 (99%) or 2017 (97%). Over the whole period, the median  
41 value of gifts per association was €61,000 (\$70,000). From 2017 to 2019, the median  
42 cumulative value for each professional medical association was €15,900 in contractual  
43 agreements and €21,900 in remunerations. The number and value of gifts, contractual  
44 agreements and remunerations for all the members of a single association varied widely from  
45 one association to another.  
46

47 The number, value and proportion of gifts, contractual agreements and remunerations  
48 for KOLs slightly decreased over time. Remunerations represented the largest amount declared  
49 for KOLs with a median amount per capita 4 times higher than for other physicians. KOLs  
50 represented 0.24% of the physicians but were associated with 1.5% of the gifts, 2.4% of the  
51 contractual agreements and 4.4% of the remunerations in value. This represents €3,700 in gifts,  
52 €1,900 in agreements and €4,100 in remunerations per capita per year. The amount for  
53 contractual agreements is probably underestimated since 79% of KOL agreement amounts were  
54 declared null in the database (see above).  
55  
56  
57  
58  
59

### 60 **Strengths and Limitations**



1  
2  
3 This study is exhaustive of all ties declared in the French Transparency in Healthcare  
4 database. All physicians practicing in France were included since declaration of industry ties is  
5 mandatory.

6 However, the results may be underestimated since many amounts for contractual  
7 agreements were not available. One reason for this is that when a physician signs an agreement  
8 conferring an advantage, the amount can be declared nil as a contractual agreement or a gift, or  
9 declared as both an agreement and a gift. There is no government control at this level.

10 The effect of this bias is difficult to predict. Either firms did not declare the amount of  
11 thousands of contractual agreements, thus underestimating the amounts received by physicians  
12 or the amount of an agreement could have been counted twice. The entire Eurofordocs database  
13 (with all beneficiaries, without time limitation) contains 5.5 million contractual agreements, 3.3  
14 million of which have a nil amount. 2.2 million gifts are reported to be linked to an agreement  
15 but have an invalid textual link. There are therefore at least 1.1 million contractual agreements  
16 with a nil amount despite the legal obligation to declare them.

17 Another limitation lies in the fact that the data comes from the declarations of the  
18 pharmaceutical industry itself with typos. Moreover, there may be a delay in data reporting,  
19 and remunerations may have been misclassified as it was possible to declare them as gifts or  
20 as remunerations until October, 2017.

21 Finally, in the absence of an official definition, we chose an objective but restrictive  
22 definition of a KOL which led us to rule out many individuals with great leverage who could  
23 also have been included as KOLs.

## 24 25 26 27 28 **Comparison with other studies**

29 Our results are in line with those observed worldwide but add new data regarding the  
30 French context. A very recent US study showed that nearly three-quarters of the leaders of the  
31 10 most influential professional medical associations in the USA had ties with the  
32 pharmaceutical industry, with wide variations in the amount of payments reported between the  
33 professional medical associations.<sup>11</sup> Total general payments of \$24.8M (€20.8M, £18.9M) were  
34 linked to the 235 KOLs of the 10 most influential professional medical associations over 3  
35 years. The total median general payment was \$6,000 (IQR \$309 to \$54 000) (€5,000, £4,500).

36 In the American study, KOLs received 10 times more per capita per year in total amount  
37 than the French KOLs, and more than 83 times more in terms of median amount.

38 The amounts involved in the American study seems to be much greater. This difference  
39 could be explained by societal differences but also by the fact that we included professional  
40 medical associations regardless of their size, cost or influence. The difference could also be  
41 explained by the fact that the USA has a population 5 times larger than France and has 4 times  
42 more physicians, which may represent an important return on investment. Finally, in the USA,  
43 there are more mandatory payments to report, and there are enforcement measures and effective  
44 penalties that do not exist in France.<sup>31</sup>

## 45 46 47 48 49 **Implications of this study**

50 Despite multiple calls for more distance,<sup>1,11,32-34</sup> KOLs still have privileged relationships  
51 with the pharmaceutical industry. This phenomenon can lead to lower quality in guidelines and  
52 to a general loss of confidence in both KOLs and physicians. In recent years, several guidelines  
53 have been abrogated due to doubts about the independence of the experts involved in writing  
54 them.<sup>35-38</sup> In turn, Chakroun et al. have shown that disclosure of conflicts of interest reduces  
55 public and physician trust in KOLs.<sup>39</sup> Experience shows that financial ties can also be  
56 instrumentalized to discredit any expert position, the link being used as an argument to call into  
57 question the scientific opinion.<sup>40-42</sup>

1  
2  
3 Our study's finding of remaining concealments in the amounts of contractual  
4 agreements, despite the legal obligation to declare them, shows that transparency is still in  
5 progress and that both researchers and citizens do not yet have access to all the data. For us, the  
6 main area for improvement would be to make it mandatory to report the amount of gifts and  
7 remunerations conferred by a contractual agreement in the contractual agreement section. In  
8 addition, the declarations should be checked by the public authorities, which is the only way to  
9 guarantee the reliability of the information provided.

10  
11 Future research might focus on the correlation between the amount of gifts and the  
12 medical specialty or the cost of the relevant diseases. Further research is needed to identify  
13 other kinds of KOLs such as the department heads of teaching hospitals, and medical university  
14 lecturers. Financial ties could be tracked over time, acting as a nudge to help chart moves  
15 towards independence.  
16  
17  
18

## 19 **Acknowledgments**

20 The authors thank Pierre-Alain Jachiet for his proofreading of the manuscript, his help to fully  
21 understand the database and properly use EuroForDocs.  
22

23 Patients and public were involved through the French FORMINDEP association that  
24 aims to improve the independence of physicians' medical education. FORMINDEP members  
25 (patients and physicians) kindly accepted to participate by reviewing and editing the  
26 manuscript. The French CI3P organization (Patient and Public Partnership Innovation Center  
27 of the Faculty of Medicine of Nice) also accepted to participate in the manuscript's revision  
28 and editing. Their comments improved the manuscript's quality, especially the discussion.  
29

30 The authors also thank the reviewers and the editor for valuable comments that helped  
31 to improve the manuscript and Yvonne van der Does (Office of International Scientific  
32 Visibility, Université Côte d'Azur) for proofreading.  
33

34 The research team would like to thank the « Agence Régionale de Santé Provence Alpes Côte  
35 d'Azur » for funding the Article Processing Charges.  
36  
37

## 38 **Footnotes**

39 Funding: none  
40

41 Competing interest: All authors have completed the ICMJE uniform disclosure form and  
42 declare: no support from any organization for the submitted work, no financial relationships  
43 with any organizations that might have an interest in the submitted work in the previous three  
44 years, no other relationships or activities that could appear to have influenced the submitted  
45 work.  
46  
47

48 Author contributions: MC and AB initiated and designed the study, searched the literature,  
49 interpreted the results and wrote the manuscript. AS performed the analysis, contributed to the  
50 study design and interpreted results. FN contributed to the study design and interpreted the  
51 results. AB is the guarantor. All authors have critically revised the manuscript and approved  
52 the manuscript. The corresponding author attests that all listed authors meet authorship  
53 criteria and that no others meeting the criteria have been omitted.  
54  
55

56 Ethical approval: Ethics approval was unnecessary because of the non-pharmaceutical bio-  
57 medical nature of this research. Ethical aspects nevertheless respect the French legislation.  
58 The data protection officer of the general and teaching hospital of Nice approved this study.  
59  
60

1  
2  
3 Data sharing statement: Data from EurosForDocs are available on  
4 <https://www.eurosfordocs.fr/data#donn-es>. Analytic code from the study is available on  
5 [https://osf.io/4756p/?view\\_only=df16d649d87847e5aa9478960620bf81](https://osf.io/4756p/?view_only=df16d649d87847e5aa9478960620bf81)  
6

7  
8 The guarantor (AB) affirms that the manuscript is an honest, accurate, and transparent account  
9 of the study being reported; that no important aspect of the study was omitted; and that any  
10 discrepancies from the study as originally planned have been explained.  
11

12 Figures legend/Caption:

13  
14 **Figure 1.** Flowchart representing how KOLs were identified by cross-checking three databases.

15  
16  
17 **Figure 2.** Evolution of the 3 kinds of financial ties for KOLs and all physicians. The gifts  
18 declared for all physicians decreased in number and value over time; the number, the value and  
19 the proportion of gifts declared for KOLs decreased. The contractual agreements declared for  
20 all physicians increased; the number, the value and the proportion of contractual agreements  
21 declared for KOLs decreased. The remunerations declared for all physicians increased; the  
22 number, the value and the proportion of remunerations declared for KOLs decreased.  
23  
24  
25  
26  
27  
28  
29

## 30 References

- 31 1. Moynihan R, Bero L, Hill S, et al. Pathways to independence: towards producing and  
32 using trustworthy evidence. *BMJ*. 2019;367. doi:10.1136/bmj.l6576
- 33 2. Lundh A, Lexchin J, Mintzes B, Schroll JB, Bero L. Industry sponsorship and research  
34 outcome. *Cochrane Database Syst Rev*. 2017;2:MR000033.  
35 doi:10.1002/14651858.MR000033.pub3
- 36 3. Brunt CS. Physician characteristics, industry transfers, and pharmaceutical  
37 prescribing: Empirical evidence from medicare and the physician payment sunshine act.  
38 *Health Serv Res*. Published online October 1, 2018. doi:10.1111/1475-6773.13064
- 39 4. Hadland SE, Rivera-Aguirre A, Marshall BDL, Cerdá M. Association of  
40 Pharmaceutical Industry Marketing of Opioid Products With Mortality From Opioid-Related  
41 Overdoses. *JAMA Netw Open*. 2019;2(1):e186007. doi:10.1001/jamanetworkopen.2018.6007
- 42 5. DeJong C, Aguilar T, Tseng C-W, Lin GA, Boscardin WJ, Dudley RA.  
43 Pharmaceutical Industry–Sponsored Meals and Physician Prescribing Patterns for Medicare  
44 Beneficiaries. *JAMA Intern Med*. 2016;176(8):1114. doi:10.1001/jamainternmed.2016.2765
- 45 6. Goupil B, Balusson F, Naudet F, et al. Association between gifts from pharmaceutical  
46 companies to French general practitioners and their drug prescribing patterns in 2016:  
47 retrospective study using the French Transparency in Healthcare and National Health Data  
48 System databases. *The BMJ*. 2019;367. doi:10.1136/bmj.l6015
- 49 7. Schott G, Dünneberger C, Mühlbauer B, Niebling W, Pachel H, Ludwig W-D. Does the  
50 Pharmaceutical Industry Influence Guidelines? *Dtsch Arztebl Int*. 2013;110(35-36):575-583.  
51 doi:10.3238/arztebl.2013.0575
- 52 8. Horn J, Checketts JX, Jawhar O, Vassar M. Evaluation of Industry Relationships  
53 Among Authors of Otolaryngology Clinical Practice Guidelines. *JAMA Otolaryngol Neck  
54 Surg*. 2018;144(3):194-201. doi:10.1001/jamaoto.2017.2741
- 55 9. Combs TR, Scott J, Jorski A, Heavener T, Vassar M. Evaluation of Industry  
56 Relationships Among Authors of Clinical Practice Guidelines in Gastroenterology. *JAMA  
57  
58  
59  
60*

- 1  
2  
3 *Intern Med.* 2018;178(12):1711-1712. doi:10.1001/jamainternmed.2018.4730
- 4 10. Checketts JX, Sims MT, Vassar M. Evaluating Industry Payments Among  
5 Dermatology Clinical Practice Guidelines Authors. *JAMA Dermatol.* 2017;153(12):1229-  
6 1235. doi:10.1001/jamadermatol.2017.3109
- 7 11. Moynihan R, Albarqouni L, Nangla C, Dunn AG, Lexchin J, Bero L. Financial ties  
8 between leaders of influential US professional medical associations and industry: cross  
9 sectional study. *BMJ.* 2020;369. doi:10.1136/bmj.m1505
- 10 12. Elder K, Turner KA, Cosgrove L, et al. Reporting of financial conflicts of interest by  
11 Canadian clinical practice guideline producers: a descriptive study. *Can Med Assoc J.*  
12 2020;192(23):E617. doi:10.1503/cmaj.191737
- 13 13. Moynihan RN, Cooke GPE, Doust JA, Bero L, Hill S, Glasziou PP. Expanding  
14 Disease Definitions in Guidelines and Expert Panel Ties to Industry: A Cross-sectional Study  
15 of Common Conditions in the United States. *PLoS Med.* 2013;10(8):e1001500.  
16 doi:10.1371/journal.pmed.1001500
- 17 14. *LOI N° 2011-2012 Du 29 Décembre 2011 Relative Au Renforcement de La Sécurité*  
18 *Sanitaire Du Médicament et Des Produits de Santé.*; 2011.
- 19 15. Décret n° 2016-1939 du 28 décembre 2016 relatif à la déclaration publique d'intérêts  
20 prévue à l'article L. 1451-1 du code de la santé publique et à la transparence des avantages  
21 accordés par les entreprises produisant ou commercialisant des produits à finalité sanitaire et  
22 cosmétique destinés à l'homme | Legifrance. Accessed June 14, 2020.  
23 <https://www.legifrance.gouv.fr/eli/decret/2016/12/28/AFSX1637582D/jo/texte>
- 24 16. Fabbri A, Santos Ancel la, Mezinska S, Mulinari S, Mintzes B. Sunshine Policies and  
25 Murky Shadows in Europe: Disclosure of Pharmaceutical Industry Payments to Health  
26 Professionals in Nine European Countries. *Int J Health Policy Manag.* 2018;7(6):504-509.  
27 doi:10.15171/ijhpm.2018.20
- 28 17. Sismondo S. How to make opinion leaders and influence people. *CMAJ Can Med*  
29 *Assoc J.* 2015;187(10):759-760. doi:10.1503/cmaj.150032
- 30 18. Coleman J, Katz E. The Diffusion of an Innovation among Physicians! :18.
- 31 19. The Pharma Marketing Glossary. Pharma Marketing Network. Accessed July 19,  
32 2020. <https://www.pharma-mkting.com/glossary/>
- 33 20. Moynihan R. Key opinion leaders: independent experts or drug representatives in  
34 disguise? *BMJ.* 2008;336(7658):1402-1403. doi:10.1136/bmj.39575.675787.651
- 35 21. Sismondo S. Key Opinion Leaders and the Corruption of Medical Knowledge: What  
36 the Sunshine Act Will and Won't Cast Light on. *J Law Med Ethics.* 2013;41(3):635-643.  
37 doi:10.1111/jlme.12073
- 38 22. Meffert JJ. Key opinion leaders: where they come from and how that affects the drugs  
39 you prescribe. *Dermatol Ther.* 2009;22(3):262-268. doi:10.1111/j.1529-8019.2009.01240.x
- 40 23. Revue Prescrire. Leaders d'opinion : coûteux, mais rentables pour les firmes  
41 pharmaceutiques. 2005;25(266):777.
- 42 24. Revue Prescrire. Les leaders d'opinion, instrument marketing des firmes. *Rev*  
43 *Prescrire.* 2012;32(341):219.
- 44 25. Nouveautés, consensus et lignes directrices - Bmlweb. Accessed June 14, 2020.  
45 <http://www.bmlweb.org/nouveaute.html>
- 46 26. Société savante - CISMef. Accessed June 14, 2020. <http://www.chu-rouen.fr/page/cismef-type-ressource/societe-savante>
- 47 27. Liste de sociétés savantes scientifiques en France. Accessed June 14, 2020.  
48 <http://dictionnaire.sensagent.leparisien.fr/LISTE%20DE%20SOCIETES%20SAVANTES%20SCIENTIFIQUES%20EN%20FRANCE/fr-fr/>
- 49 28. Euros for Docs - vison par professionnel bénéficiaire. Accessed June 14, 2020.  
50 <https://www.eurosfordocs.fr/metabase/dashboard/2>
- 51  
52  
53  
54  
55  
56  
57  
58  
59  
60

- 1  
2  
3 29. Traitement des données EuroforDocs. Euro For Docs. Accessed June 14, 2020.  
4 <https://www.eurofordocs.fr/data/>
- 5 30. R Development Core Team (2005). R: A language and environment for statistical  
6 computing. R Foundation for Statistical Computing, Vienna, Austria. ISBN 3-900051-07-0,  
7 URL: <http://www.R-project.org>. Accessed August 12, 2020.  
8 <https://wp.unil.ch/asi/documentation/citer-r-dans-un-rapport/>
- 9 31. Rapport : La prévention des conflits d'intérêts en matière d'expertise sanitaire – mars  
10 2016. Accessed August 5, 2020.  
11 [https://www.ccomptes.fr/sites/default/files/EzPublish/20160323-prevention-conflits-interets-  
12 en-matiere-expertise-sanitaire.pdf#page=65](https://www.ccomptes.fr/sites/default/files/EzPublish/20160323-prevention-conflits-interets-en-matiere-expertise-sanitaire.pdf#page=65)
- 13 32. Fava GA. Should the drug industry work with key opinion leaders? No. *BMJ*.  
14 2008;336(7658):1405. doi:10.1136/bmj.39541.731493.59
- 15 33. Sculier J-P. Conflits d'intérêt : une notion souvent (volontairement) ignorée des  
16 médecins Conflicts of interest : a concept often (voluntary) ignored by physicians. *Rev Med*  
17 *Brux*. 2010;(31):199-205.
- 18 34. Wilson M. The Sunshine Act: Commercial conflicts of interest and the limits of  
19 transparency. *Open Med*. 2014;8(1):e10-e13.
- 20 35. Décision n°2011.05.064/MJ du 18 mai 2011 du Collège de la Haute Autorité de Santé  
21 portant abrogation de la recommandation « Diagnostic et prise en charge de la maladie  
22 d'Alzheimer et des maladies apparentées ». Haute Autorité de Santé. Accessed November 9,  
23 2020. [https://webzine.has-sante.fr/jcms/c\\_1056866/fr/decision-n2011-05-064/mj-du-18-mai-  
24 2011-du-college-de-la-haute-autorite-de-sante-portant-abrogation-de-la-recommandation-  
25 diagnostic-et-prise-en-charge-de-la-maladie-d-alzheimer-et-des-maladies-apparentees](https://webzine.has-sante.fr/jcms/c_1056866/fr/decision-n2011-05-064/mj-du-18-mai-2011-du-college-de-la-haute-autorite-de-sante-portant-abrogation-de-la-recommandation-diagnostic-et-prise-en-charge-de-la-maladie-d-alzheimer-et-des-maladies-apparentees)
- 26 36. Dyslipidémies : face au doute sur l'impartialité de certains de ses experts, la HAS  
27 abroge sa recommandation. Haute Autorité de Santé. Accessed August 5, 2020.  
28 [https://www.has-sante.fr/jcms/c\\_2885402/fr/dyslipidemies-face-au-doute-sur-l-impartialite-  
29 de-certains-de-ses-experts-la-has-abroge-sa-recommandation](https://www.has-sante.fr/jcms/c_2885402/fr/dyslipidemies-face-au-doute-sur-l-impartialite-de-certains-de-ses-experts-la-has-abroge-sa-recommandation)
- 30 37. Traitement médicamenteux du diabète de type 2 : recommandation retirée le 2 mai  
31 2011. Haute Autorité de Santé. Accessed August 5, 2020. [https://www.has-  
32 sante.fr/jcms/c\\_459270/fr/traitement-medicamenteux-du-diabete-de-type-2-recommandation-  
33 retiree-le-2-mai-2011](https://www.has-sante.fr/jcms/c_459270/fr/traitement-medicamenteux-du-diabete-de-type-2-recommandation-retiree-le-2-mai-2011)
- 34 38. Barbaroux A, Jedat V. Lifelong continuing education. Critical analysis of scientific  
35 and medical information. Management of links of interest. *exercer* 2020;163:233-6.
- 36 39. Chakroun R, Milhabet I. Medical opinion leaders conflict of interests: effects of  
37 disclosures on the trust of the public and general practitioners. *Rev Epidemiol Sante Publique*.  
38 2011;59(4):233-242. doi:10.1016/j.respe.2010.12.011
- 39 40. Conflits d'intérêts : Karine Lacombe répond à Didier Raoult. *egora.fr*. Published June  
40 26, 2020. Accessed August 5, 2020. [https://www.egora.fr/actus-pro/sante-publique/59825-  
41 conflits-d-interets-karine-lacombe-repond-a-didier-raoult](https://www.egora.fr/actus-pro/sante-publique/59825-conflits-d-interets-karine-lacombe-repond-a-didier-raoult)
- 42 41. Girard E. 118.000 euros de MSD, 116.000 euros de Roche : faut-il s'inquiéter des liens  
43 entre labos et conseils scientifiques ? Marianne. Published April 3, 2020. Accessed August 5,  
44 2020. [https://www.marianne.net/societe/118000-euros-de-msd-116000-euros-de-roche-faut-il-  
45 s-inquieter-des-liens-entre-labos-et](https://www.marianne.net/societe/118000-euros-de-msd-116000-euros-de-roche-faut-il-s-inquieter-des-liens-entre-labos-et)
- 46 42. Sallet F, Lebossé V, Toulemonde M. #TransparenceCHU : comment nous avons  
47 enquêté sur les liens entre labos et médecins. *leparisien.fr*. Published January 10, 2020.  
48 Accessed August 6, 2020. [https://www.leparisien.fr/economie/transparencechu-comment-  
49 nous-avons-enquete-sur-les-liens-entre-labos-et-medecins-10-01-2020-8233257.php](https://www.leparisien.fr/economie/transparencechu-comment-nous-avons-enquete-sur-les-liens-entre-labos-et-medecins-10-01-2020-8233257.php)
- 50  
51  
52  
53  
54  
55  
56  
57  
58  
59  
60

**Table 1** presents the 3 categories of financial ties and the date from which they had to be declared in the Transparency in Healthcare database (Transparence-Santé). The Transparency in Healthcare database was laid down in the "Strengthening the safety of medicines and health products" law of December, 2011, and launched in July, 2014.

| <i>Type of ties</i>           | <b>Definition</b>                                                                                                                                                                                                                                                                                                                                                                                                                                                                                                        | <b>Mandatory information to declare</b>                                                                                                                                                                                                                                                                                                                                                                                                                                                                                           |
|-------------------------------|--------------------------------------------------------------------------------------------------------------------------------------------------------------------------------------------------------------------------------------------------------------------------------------------------------------------------------------------------------------------------------------------------------------------------------------------------------------------------------------------------------------------------|-----------------------------------------------------------------------------------------------------------------------------------------------------------------------------------------------------------------------------------------------------------------------------------------------------------------------------------------------------------------------------------------------------------------------------------------------------------------------------------------------------------------------------------|
| <i>Gifts</i>                  | Anything that is allocated or paid without consideration by a company to a health actor, with a value greater than or equal to 10 euros including taxes. Available categories on the website = gifts, contribution to the cost of promotional, scientific or professional events, accommodation, hospitality, catering, transport, transport and hospitality, in-kind donations, donations, donations of money, grants, training, expenditures for services and advice, fees, failed category association, empty, other. | Identity of the parties concerned, amount, nature and date of each gift. Mandatory since the law of 2013; actual website availability in 2014.                                                                                                                                                                                                                                                                                                                                                                                    |
| <i>Contractual Agreements</i> | Contracts involving obligations on the part of the physician and the industry. For example, participation in a congress as a speaker by the physician with payment for the lecture by the company, or participation at the presentation of a new medical device by the physician with payment for transport and accommodation by the company. The agreements concern research activities, clinical trials, participation in a scientific congress or training activities.                                                | Identity of the parties concerned, the organizer, the name, date and place of the event, date of the agreement, its precise purpose (mandatory since the law of 2013; actual availability on the website since 2014) and the amount (mandatory since the law of 2016, actual availability on the website since 2017). If the agreements give rise to payments in gifts or remuneration, the payments can be reported in the agreements category or the gifts or remunerations categories, with a numerical link to the agreement. |
| <i>Remunerations</i>          | Payment for work or services with a value of more than 10 euros including taxes.                                                                                                                                                                                                                                                                                                                                                                                                                                         | Identity of the parties, final beneficiary, date of payment, amount if it is greater than or equal to 10 euros (available since 2015 but mandatory since the law of 2016, actual website availability in the remuneration section in 2017).                                                                                                                                                                                                                                                                                       |

**Table 2.** Median (IQR) amount of gifts to KOL and non-KOL physicians in euros (€).

| <i>Gift category</i>                                   | <i>Physician category</i> | 2014            | 2015           | 2016           | 2017          | 2018           | 2019          |
|--------------------------------------------------------|---------------------------|-----------------|----------------|----------------|---------------|----------------|---------------|
| <i>Accommodation</i>                                   | <i>All physicians</i>     | 210 (165-314)   | 215 (165-341)  | 215 (170-314)  | 215 (164-323) | 221 (170-349)  | 218 (173-328) |
|                                                        | <i>KOL</i>                | 218 (172-305)   | 220 (170-330)  | 218 (179-296)  | 226 (176-313) | 221 (175-323)  | 229 (180-344) |
| <i>Hospitality</i>                                     | <i>All physicians</i>     | 50 (27-118)     | 45 (25-60)     | 46 (24-60)     | 55 (30-60)    | 53 (28-60)     | 52 (28-60)    |
|                                                        | <i>KOL</i>                | 70 (30-448)     | 58 (28.2-258)  | 60 (30-258)    | 80.5 (40-362) | 60 (29-319)    | 60 (30-329)   |
| <i>Catering</i>                                        | <i>All physicians</i>     | 40 (24-55)      | 40 (24-56)     | 38 (23-55)     | 38 (23-56)    | 38 (23-56)     | 38 (24-57)    |
|                                                        | <i>KOL</i>                | 40 (23-59)      | 40 (23-59)     | 40 (23-58)     | 40 (23-58)    | 40 (24-59)     | 40 (24-59)    |
| <i>Transport</i>                                       | <i>All physicians</i>     | 208 (91-420)    | 200 (88-398)   | 191 (85-380)   | 189 (79-357)  | 182 (81-344)   | 177 (77-332)  |
|                                                        | <i>KOL</i>                | 202 (70-471)    | 206 (74.2-461) | 244 (96-477)   | 207 (77-445)  | 198 (79.8-414) | 187 (71-395)  |
| <i>Contributions to the cost of promotional events</i> | <i>All physicians</i>     | 60 (50-400)     | 60 (50-404)    | 60 (44-400)    | 200 (55-455)  | 400 (250-590)  | 440 (260-650) |
|                                                        | <i>KOL</i>                | 320 (60-591)    | 350 (60-600)   | 390 (87-650)   | 450 (186-729) | 470 (290-740)  | 538 (290-796) |
| <i>Donations-Grants-Training</i>                       | <i>All physicians</i>     | 21 (17-30)      | 23 (17-50)     | 36 (23-94)     | 62 (30-171)   | 55 (29-171)    | 55 (25-144)   |
|                                                        | <i>KOL</i>                | 83 (60-275)     | 68 (27.5-1578) | 96 (63.5-138)  | 76 (45-192)   | 155 (42-225)   | 80 (42-180)   |
| <i>Service and consulting</i>                          | <i>All physicians</i>     | 26 (22-30)      | 30 (22-45)     | 30 (24-50)     | 30 (25-40)    | 50 (25-80)     | 116 (40-362)  |
|                                                        | <i>KOL</i>                | 30 (24-120)     | 47 (29-325)    | 65 (30-600)    | 32 (25-83)    | 130 (74-309)   | 158 (69-506)  |
| <i>Other</i>                                           | <i>All physicians</i>     | 100 (30-350)    | 140 (30-496)   | 100 (19-375)   | 22 (16-84)    | 25 (16-104)    | 49 (16-220)   |
|                                                        | <i>KOL</i>                | 337 (34.8-1000) | 800 (195-1188) | 700 (100-1000) | 310 (23-915)  | 40 (12-153)    | 79.5 (12-500) |
| <i>TOTAL</i>                                           | <i>All physicians</i>     | 45 (25-60)      | 45 (25-60)     | 45 (25-60)     | 46 (25-60)    | 48 (25-60)     | 49 (26-60)    |
|                                                        | <i>KOL</i>                | 59 (29-198)     | 60 (30-224)    | 60 (30-217)    | 60 (30-213)   | 60 (31-214)    | 60 (31-210)   |

**Table 3.** Number of contractual agreements with no amount, total value of agreements for which an amount could be found and number of agreements with a declared amount in the contractual agreement section, total and median (IQR) amount of remunerations to KOL and non-KOL physicians, year by year since they are consistently declared.

| Payment category              | Physicians category   | Amount                                                                                                                         | 2017                    | 2018             | 2019           | Total        |             |
|-------------------------------|-----------------------|--------------------------------------------------------------------------------------------------------------------------------|-------------------------|------------------|----------------|--------------|-------------|
| <i>Contractual agreements</i> | <i>All physicians</i> | Number of agreements for which the amount could not be found in the agreement section (percentage of the number of agreements) | 446,204 (79%)           | 443,687 (79%)    | 394,393 (72%)  | 1,284,284    |             |
|                               |                       | Total value of agreements for which an amount could be found in the agreement section in €                                     | 42,905,877              | 39,962,079       | 43,098,150     | 125,966,106  |             |
|                               |                       | Number of agreements with a declared amount in the agreement section                                                           | 118,860                 | 119,844          | 150,987        | 389,691      |             |
|                               | <i>KOL</i>            | Number of agreements for which the amount could not be found in the agreement section (percentage of the number of agreements) | 3,514 (80%)             | 3,319 (80%)      | 2,663 (76%)    | 9,496        |             |
|                               |                       | Total value of agreements for which an amount could be found in the agreement section in €                                     | 1,123,947               | 1,040,295        | 1,000,651      | 3,164,893    |             |
|                               |                       | Number of agreements with a declared amount in the agreement section                                                           | 903                     | 837              | 843            | 2,583        |             |
|                               | <i>Remunerations</i>  | <i>All physicians</i>                                                                                                          | Total amount in €       | 49,152,264       | 53,142,546     | 54,254,342   | 156,549 152 |
|                               |                       |                                                                                                                                | Median (IQR)            | 300 (65-750)     | 350 (65-800)   | 130 (50-613) | 250         |
|                               |                       |                                                                                                                                | Number of remunerations | 77,277           | 77,436         | 96,160       | 250,573     |
| <i>KOL</i>                    |                       | Total amount in €                                                                                                              | 2,355,894               | 2,346,293        | 2,172,827      | 6,875,014    |             |
|                               |                       | Median (IQR)                                                                                                                   | 946 (527-1440)          | 1,000 (600-1497) | 998 (538-1375) | 1,000        |             |
|                               |                       | Number of remunerations                                                                                                        | 1,950                   | 1,901            | 1,876          | 5,718        |             |



Page 17 of 20  
144 professional  
medical associations  
on BML website

BMJ Open  
92 professional  
medical associations  
on Cismef website

76 professional  
medical associations  
on Le Parisien website

1  
2  
3  
4  
5  
6  
7  
8  
9  
10  
11  
12  
13  
14  
15  
16  
238 duplicate-free associations

101 associations having published clinical  
practice guidelines in 2018 or 2019

99 associations with a board or governing  
council on a website

605 OL identified

548 OL on the database



For peer review only - <http://bmjopen.bmj.com/site/about/guidelines.xhtml>

— OL — Total

# Reporting checklist for cross sectional study.

Based on the STROBE cross sectional guidelines.

## Instructions to authors

Complete this checklist by entering the page numbers from your manuscript where readers will find each of the items listed below.

Your article may not currently address all the items on the checklist. Please modify your text to include the missing information. If you are certain that an item does not apply, please write "n/a" and provide a short explanation.

Upload your completed checklist as an extra file when you submit to a journal.

In your methods section, say that you used the STROBE cross sectional reporting guidelines, and cite them as:

von Elm E, Altman DG, Egger M, Pocock SJ, Gøtzsche PC, Vandenbroucke JP. The Strengthening the Reporting of Observational Studies in Epidemiology (STROBE) Statement: guidelines for reporting observational studies.

|                           |                     | Reporting Item                                                                                  | Page Number |
|---------------------------|---------------------|-------------------------------------------------------------------------------------------------|-------------|
| <b>Title and abstract</b> |                     |                                                                                                 |             |
| Title                     | <a href="#">#1a</a> | Indicate the study's design with a commonly used term in the title or the abstract              | 1           |
| Abstract                  | <a href="#">#1b</a> | Provide in the abstract an informative and balanced summary of what was done and what was found | 2           |
| <b>Introduction</b>       |                     |                                                                                                 |             |
| Background / rationale    | <a href="#">#2</a>  | Explain the scientific background and rationale for the investigation being reported            | 3           |
| Objectives                | <a href="#">#3</a>  | State specific objectives, including any prespecified hypotheses                                | 3           |
| <b>Methods</b>            |                     |                                                                                                 |             |
| Study design              | <a href="#">#4</a>  | Present key elements of study design early in the paper                                         | 3           |
| Setting                   | <a href="#">#5</a>  | Describe the setting, locations, and relevant dates, including periods of                       | 3           |

recruitment, exposure, follow-up, and data collection

|    |                      |                      |                                                                                                                                                                                                                                                                                  |
|----|----------------------|----------------------|----------------------------------------------------------------------------------------------------------------------------------------------------------------------------------------------------------------------------------------------------------------------------------|
| 1  |                      |                      |                                                                                                                                                                                                                                                                                  |
| 2  |                      |                      |                                                                                                                                                                                                                                                                                  |
| 3  | Eligibility criteria | <a href="#">#6a</a>  | Give the eligibility criteria, and the sources and methods of selection of participants. 4                                                                                                                                                                                       |
| 4  |                      |                      |                                                                                                                                                                                                                                                                                  |
| 5  |                      |                      |                                                                                                                                                                                                                                                                                  |
| 6  |                      | <a href="#">#7</a>   | Clearly define all outcomes, exposures, predictors, potential confounders, and effect modifiers. Give diagnostic criteria, if applicable 4                                                                                                                                       |
| 7  |                      |                      |                                                                                                                                                                                                                                                                                  |
| 8  |                      |                      |                                                                                                                                                                                                                                                                                  |
| 9  |                      |                      |                                                                                                                                                                                                                                                                                  |
| 10 | Data sources /       | <a href="#">#8</a>   | For each variable of interest give sources of data and details of methods of assessment (measurement). Describe comparability of assessment methods if there is more than one group. Give information separately for for exposed and unexposed groups if applicable. 4           |
| 11 | measurement          |                      |                                                                                                                                                                                                                                                                                  |
| 12 |                      |                      |                                                                                                                                                                                                                                                                                  |
| 13 |                      |                      |                                                                                                                                                                                                                                                                                  |
| 14 |                      |                      |                                                                                                                                                                                                                                                                                  |
| 15 |                      |                      |                                                                                                                                                                                                                                                                                  |
| 16 |                      |                      |                                                                                                                                                                                                                                                                                  |
| 17 | Bias                 | <a href="#">#9</a>   | Describe any efforts to address potential sources of bias 4                                                                                                                                                                                                                      |
| 18 |                      |                      |                                                                                                                                                                                                                                                                                  |
| 19 | Study size           | <a href="#">#10</a>  | Explain how the study size was arrived at 4                                                                                                                                                                                                                                      |
| 20 |                      |                      |                                                                                                                                                                                                                                                                                  |
| 21 | Quantitative         | <a href="#">#11</a>  | Explain how quantitative variables were handled in the analyses. If applicable, describe which groupings were chosen, and why 4                                                                                                                                                  |
| 22 | variables            |                      |                                                                                                                                                                                                                                                                                  |
| 23 |                      |                      |                                                                                                                                                                                                                                                                                  |
| 24 |                      |                      |                                                                                                                                                                                                                                                                                  |
| 25 | Statistical          | <a href="#">#12a</a> | Describe all statistical methods, including those used to control for confounding 4                                                                                                                                                                                              |
| 26 | methods              |                      |                                                                                                                                                                                                                                                                                  |
| 27 |                      |                      |                                                                                                                                                                                                                                                                                  |
| 28 |                      |                      |                                                                                                                                                                                                                                                                                  |
| 29 | Statistical          | <a href="#">#12b</a> | Describe any methods used to examine subgroups and interactions 4                                                                                                                                                                                                                |
| 30 | methods              |                      |                                                                                                                                                                                                                                                                                  |
| 31 |                      |                      |                                                                                                                                                                                                                                                                                  |
| 32 |                      |                      |                                                                                                                                                                                                                                                                                  |
| 33 | Statistical          | <a href="#">#12c</a> | Explain how missing data were addressed 4                                                                                                                                                                                                                                        |
| 34 | methods              |                      |                                                                                                                                                                                                                                                                                  |
| 35 |                      |                      |                                                                                                                                                                                                                                                                                  |
| 36 |                      |                      |                                                                                                                                                                                                                                                                                  |
| 37 | Statistical          | <a href="#">#12d</a> | If applicable, describe analytical methods taking account of sampling strategy 4                                                                                                                                                                                                 |
| 38 | methods              |                      |                                                                                                                                                                                                                                                                                  |
| 39 |                      |                      |                                                                                                                                                                                                                                                                                  |
| 40 |                      |                      |                                                                                                                                                                                                                                                                                  |
| 41 | Statistical          | <a href="#">#12e</a> | Describe any sensitivity analyses 4                                                                                                                                                                                                                                              |
| 42 | methods              |                      |                                                                                                                                                                                                                                                                                  |
| 43 |                      |                      |                                                                                                                                                                                                                                                                                  |
| 44 | <b>Results</b>       |                      |                                                                                                                                                                                                                                                                                  |
| 45 |                      |                      |                                                                                                                                                                                                                                                                                  |
| 46 |                      |                      |                                                                                                                                                                                                                                                                                  |
| 47 | Participants         | <a href="#">#13a</a> | Report numbers of individuals at each stage of study—eg numbers potentially eligible, examined for eligibility, confirmed eligible, included in the study, completing follow-up, and analysed. Give information separately for for exposed and unexposed groups if applicable. 5 |
| 48 |                      |                      |                                                                                                                                                                                                                                                                                  |
| 49 |                      |                      |                                                                                                                                                                                                                                                                                  |
| 50 |                      |                      |                                                                                                                                                                                                                                                                                  |
| 51 |                      |                      |                                                                                                                                                                                                                                                                                  |
| 52 |                      |                      |                                                                                                                                                                                                                                                                                  |
| 53 |                      |                      |                                                                                                                                                                                                                                                                                  |
| 54 |                      |                      |                                                                                                                                                                                                                                                                                  |
| 55 | Participants         | <a href="#">#13b</a> | Give reasons for non-participation at each stage 5                                                                                                                                                                                                                               |
| 56 |                      |                      |                                                                                                                                                                                                                                                                                  |
| 57 | Participants         | <a href="#">#13c</a> | Consider use of a flow diagram 5                                                                                                                                                                                                                                                 |
| 58 |                      |                      |                                                                                                                                                                                                                                                                                  |
| 59 |                      |                      |                                                                                                                                                                                                                                                                                  |
| 60 |                      |                      |                                                                                                                                                                                                                                                                                  |

|    |                    |                      |                                                                                                                                                                                                                   |   |
|----|--------------------|----------------------|-------------------------------------------------------------------------------------------------------------------------------------------------------------------------------------------------------------------|---|
| 1  | Descriptive data   | <a href="#">#14a</a> | Give characteristics of study participants (eg demographic, clinical, social) and information on exposures and potential confounders. Give information separately for exposed and unexposed groups if applicable. | 5 |
| 2  |                    |                      |                                                                                                                                                                                                                   |   |
| 3  |                    |                      |                                                                                                                                                                                                                   |   |
| 4  |                    |                      |                                                                                                                                                                                                                   |   |
| 5  |                    |                      |                                                                                                                                                                                                                   |   |
| 6  | Descriptive data   | <a href="#">#14b</a> | Indicate number of participants with missing data for each variable of interest                                                                                                                                   | 5 |
| 7  |                    |                      |                                                                                                                                                                                                                   |   |
| 8  |                    |                      |                                                                                                                                                                                                                   |   |
| 9  |                    |                      |                                                                                                                                                                                                                   |   |
| 10 | Outcome data       | <a href="#">#15</a>  | Report numbers of outcome events or summary measures. Give information separately for exposed and unexposed groups if applicable.                                                                                 | 5 |
| 11 |                    |                      |                                                                                                                                                                                                                   |   |
| 12 |                    |                      |                                                                                                                                                                                                                   |   |
| 13 |                    |                      |                                                                                                                                                                                                                   |   |
| 14 | Main results       | <a href="#">#16a</a> | Give unadjusted estimates and, if applicable, confounder-adjusted estimates and their precision (eg, 95% confidence interval). Make clear which confounders were adjusted for and why they were included          | 5 |
| 15 |                    |                      |                                                                                                                                                                                                                   |   |
| 16 |                    |                      |                                                                                                                                                                                                                   |   |
| 17 |                    |                      |                                                                                                                                                                                                                   |   |
| 18 |                    |                      |                                                                                                                                                                                                                   |   |
| 19 | Main results       | <a href="#">#16b</a> | Report category boundaries when continuous variables were categorized                                                                                                                                             | 5 |
| 20 |                    |                      |                                                                                                                                                                                                                   |   |
| 21 | Main results       | <a href="#">#16c</a> | If relevant, consider translating estimates of relative risk into absolute risk for a meaningful time period                                                                                                      | 5 |
| 22 |                    |                      |                                                                                                                                                                                                                   |   |
| 23 |                    |                      |                                                                                                                                                                                                                   |   |
| 24 |                    |                      |                                                                                                                                                                                                                   |   |
| 25 | Other analyses     | <a href="#">#17</a>  | Report other analyses done—e.g., analyses of subgroups and interactions, and sensitivity analyses                                                                                                                 | 5 |
| 26 |                    |                      |                                                                                                                                                                                                                   |   |
| 27 |                    |                      |                                                                                                                                                                                                                   |   |
| 28 |                    |                      |                                                                                                                                                                                                                   |   |
| 29 | <b>Discussion</b>  |                      |                                                                                                                                                                                                                   |   |
| 30 |                    |                      |                                                                                                                                                                                                                   |   |
| 31 | Key results        | <a href="#">#18</a>  | Summarise key results with reference to study objectives                                                                                                                                                          | 7 |
| 32 |                    |                      |                                                                                                                                                                                                                   |   |
| 33 |                    |                      |                                                                                                                                                                                                                   |   |
| 34 | Limitations        | <a href="#">#19</a>  | Discuss limitations of the study, taking into account sources of potential bias or imprecision. Discuss both direction and magnitude of any potential bias.                                                       | 7 |
| 35 |                    |                      |                                                                                                                                                                                                                   |   |
| 36 |                    |                      |                                                                                                                                                                                                                   |   |
| 37 |                    |                      |                                                                                                                                                                                                                   |   |
| 38 |                    |                      |                                                                                                                                                                                                                   |   |
| 39 | Interpretation     | <a href="#">#20</a>  | Give a cautious overall interpretation considering objectives, limitations, multiplicity of analyses, results from similar studies, and other relevant evidence.                                                  | 7 |
| 40 |                    |                      |                                                                                                                                                                                                                   |   |
| 41 |                    |                      |                                                                                                                                                                                                                   |   |
| 42 |                    |                      |                                                                                                                                                                                                                   |   |
| 43 |                    |                      |                                                                                                                                                                                                                   |   |
| 44 | Generalisability   | <a href="#">#21</a>  | Discuss the generalisability (external validity) of the study results                                                                                                                                             | 7 |
| 45 |                    |                      |                                                                                                                                                                                                                   |   |
| 46 |                    |                      |                                                                                                                                                                                                                   |   |
| 47 | <b>Other</b>       |                      |                                                                                                                                                                                                                   |   |
| 48 | <b>Information</b> |                      |                                                                                                                                                                                                                   |   |
| 49 |                    |                      |                                                                                                                                                                                                                   |   |
| 50 |                    |                      |                                                                                                                                                                                                                   |   |
| 51 | Funding            | <a href="#">#22</a>  | Give the source of funding and the role of the funders for the present study and, if applicable, for the original study on which the present article is based                                                     | 9 |
| 52 |                    |                      |                                                                                                                                                                                                                   |   |
| 53 |                    |                      |                                                                                                                                                                                                                   |   |
| 54 |                    |                      |                                                                                                                                                                                                                   |   |
| 55 |                    |                      |                                                                                                                                                                                                                   |   |

The STROBE checklist is distributed under the terms of the Creative Commons Attribution License CC-BY.

This checklist was completed on 07. March 2021 using <https://www.goodreports.org/>, a tool made by the

[EQUATOR Network](#) in collaboration with [Penelope.ai](#)

For peer review only - <http://bmjopen.bmj.com/site/about/guidelines.xhtml>
